# Supplementary material
Source: PubMed Central journal article supplement (PMC7398053)
Supplement: mmc1.pdf [file mmc1.pdf]

# Sex and “the City”: Financial Stress and Online Pornography Consumption

(Blinded Appendix)

June, 2020

## A Times series of online pornography data

### European cities

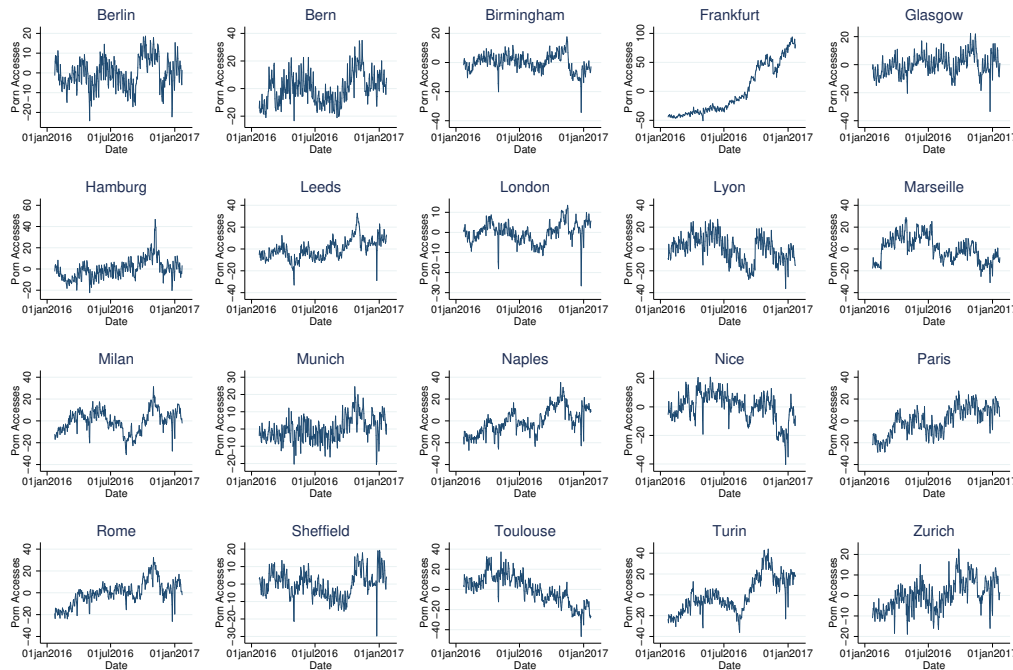

## US cities

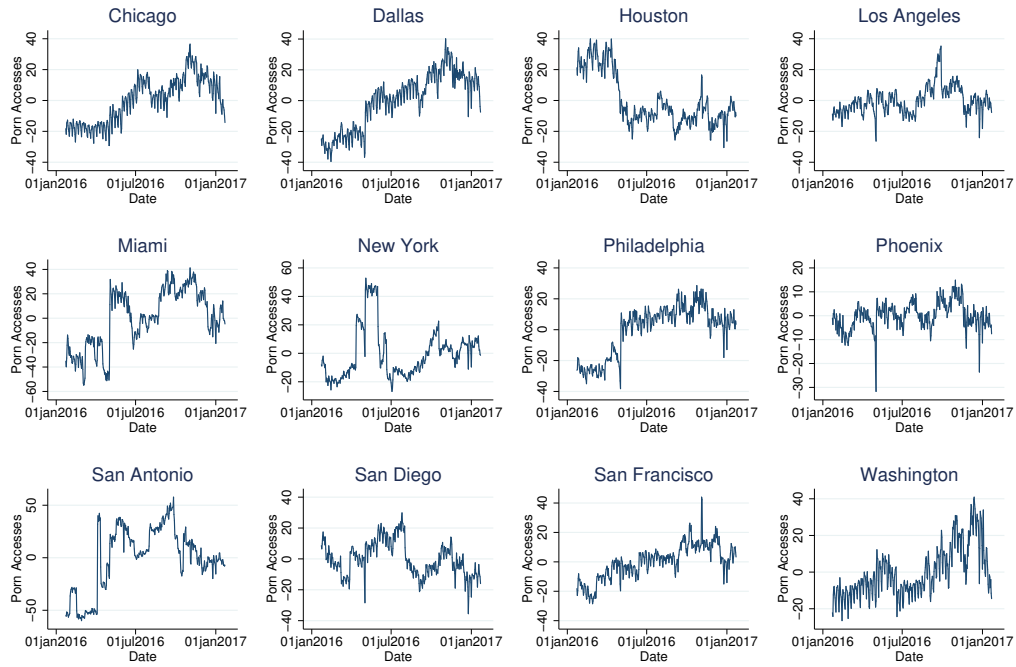

## Asian cities

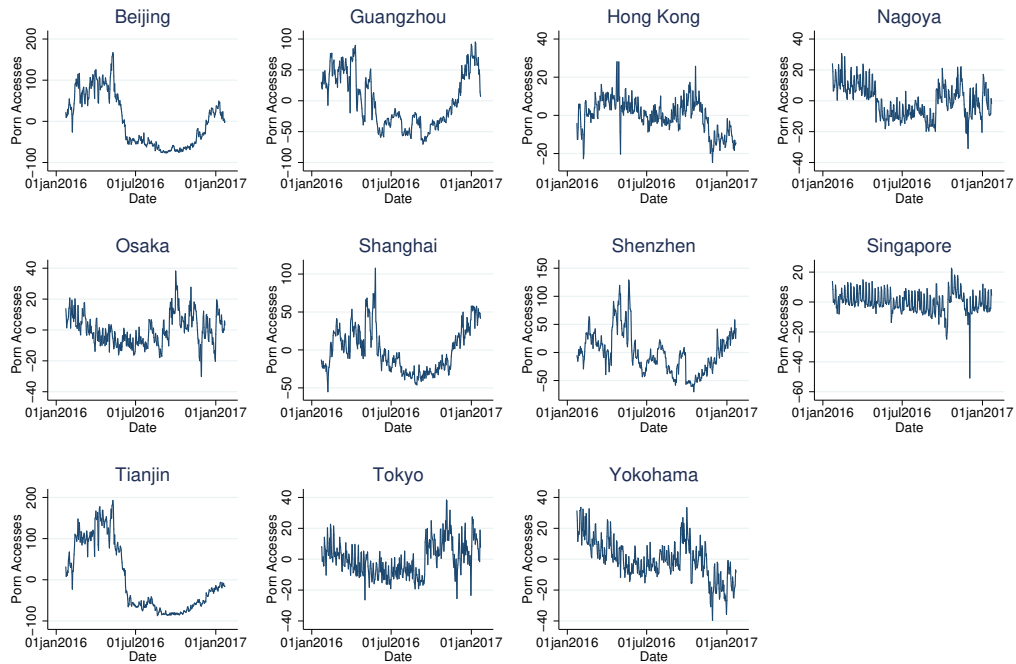

## B Cities and countries

Table B.1: Financial Cities Categorization

| City          | Country     | Top 10 Banks Present*                              | Financial city** |
|---------------|-------------|----------------------------------------------------|------------------|
| Beijing       | China       | ICBC, CCB, ABC, BOC, MUFG, BOA, CA                 |                  |
| Berlin        | Germany     | MUFG, HSBC                                         |                  |
| Bern          | Switzerland |                                                    |                  |
| Birmingham    | UK          | HSBC                                               |                  |
| Chicago       | US          | MUFG, JPM, HSBC, BNP, BOA, CA                      | Yes              |
| Dallas        | US          | MUFG, JPM                                          |                  |
| Frankfurt     | Germany     | ICBC, CCB, ABC, MUFG, JPM, HSBC, BNP, BOA, CA      | Yes              |
| Glasgow       | UK          | HSBC                                               |                  |
| Guangzhou     | China       | MUFG, HSBC, BOA, CA                                |                  |
| Hamburg       | Germany     | MUFG, HSBC, CA                                     |                  |
| Hong Kong     | China       | CCB, ABC, MUFG, JPM, HSBC, BNP, BOA, CA            | Yes              |
| Houston       | US          | MUFG, JPM, CA                                      |                  |
| Leeds         | UK          | HSBC                                               |                  |
| London        | UK          | ICBC, CCB, ABC, BOC, MUFG, JPM, HSBC, BNP, BOA, CA | Yes              |
| Los Angeles   | US          | MUFG, JPM                                          |                  |
| Lyon          | France      | HSBC, CA                                           |                  |
| Marseille     | France      | HSBC, CA                                           |                  |
| Miami         | US          | JPM, HSBC, BOA                                     |                  |
| Milan         | Italy       | MUFG, JPM, BNP, BOA, CA                            | Yes              |
| Munich        | Germany     | MUFG, HSBC                                         |                  |
| Nagoya        | Japan       |                                                    |                  |
| Naples        | Italy       |                                                    |                  |
| New York      | US          | ICBC, CCB, ABC, BOC, MUFG, JPM, HSBC, BNP, BOA, CA | Yes              |
| Nice          | France      |                                                    |                  |
| Osaka         | Japan       | MUFG                                               |                  |
| Paris         | France      | BOC, MUFG, JPM, HSBC, BNP, BOA, CA                 | Yes              |
| Philadelphia  | US          | JPM                                                |                  |
| Phoenix       | US          |                                                    |                  |
| Rome          | Italy       |                                                    |                  |
| San Antonio   | US          | JPM                                                |                  |
| San Diego     | US          |                                                    |                  |
| San Francisco | US          | MUFG, JPM, HSBC, BOA                               |                  |
| Shanghai      | China       | MUFG, HSBC, BNP, BOA, CA                           | Yes              |
| Sheffield     | UK          |                                                    |                  |
| Shenzhen      | China       | MUFG, CA                                           |                  |
| Singapore     | Singapore   | ABC, MUFG, JPM, HSBC, BNP, BOA, CA                 | Yes              |
| Tianjin       | China       | MUFG, CA                                           |                  |
| Tokyo         | Japan       | ABC, MUFG, BNP, BOA, CA                            | Yes              |
| Toulouse      | France      | CA                                                 |                  |
| Turin         | Italy       |                                                    |                  |
| Washington    | US          | MUFG, JPM                                          |                  |
| Yokohama      | Japan       |                                                    |                  |
| Zurich        | Switzerland | JPM, HSBC, BOA, CA                                 | Yes              |

\*Top 10 banks according to the 2016 S&P Global Market Intelligence ranking: Industrial & Commercial Bank of China Ltd. (ICBC), China Construction Bank Corp. (CCB), Agricultural Bank of China Ltd. (ABC), Bank of China Ltd. (BOC), Mitsubishi UFJ Financial Group Inc. (MUFG), JPMorgan Chase & Co. (JPM), HSBC Holdings Plc. (HSBC), BNP Paribas SA (BNP), Bank of America Corp. (BOA), Credit Agricole Group (CA).

\*\*We categorize a financial city as one in which at least five out of the top ten banks have offices. Given that a bank's "nationality" influences its presence in its country, we slightly re-categorize our financial city dummy; for instance, as the top 4 banks are Chinese (and the 5th one Japanese), we re-categorize Beijing as a non-financial city. If we extend the list to the top 20 banks, we find similar categorization results.

# C Empirical Findings: Regression Tables

## C.1 Controlling for serial correlation

Table C.1: Effect of financial stress on online pornography consumption (pooled regressions, controlling for serial correlation)

| Dependent variable: Online Pornographic Videos Accesses |                                |                               |                               |                                |                              |                               |                                 |                                  |                                 |
|---------------------------------------------------------|--------------------------------|-------------------------------|-------------------------------|--------------------------------|------------------------------|-------------------------------|---------------------------------|----------------------------------|---------------------------------|
|                                                         | (1)                            | (2)                           | (3)                           | (4)                            | (5)                          | (6)                           | (7)                             | (8)                              | (9)                             |
| Volatility                                              | -0.0189<br>(0.0500)<br>[0.708] | 0.469<br>(1.158)<br>[0.688]   | 5.426*<br>(3.013)<br>[0.079]  | 3.696<br>(2.653)<br>[0.171]    | 245.4<br>(175.2)<br>[0.169]  | 281.9<br>(202.2)<br>[0.171]   | 0.391***<br>(0.0889)<br>[0.000] | -0.330***<br>(0.0938)<br>[0.001] | -2.970***<br>(1.083)<br>[0.009] |
| Volatility*Financial City                               | -0.202<br>(0.149)<br>[0.183]   | -7.709*<br>(4.276)<br>[0.079] | -11.42*<br>(5.904)<br>[0.060] | -13.74**<br>(6.792)<br>[0.049] | -775.4<br>(465.2)<br>[0.103] | -917.5*<br>(539.9)<br>[0.097] | -0.975*<br>(0.557)<br>[0.090]   | 0.0902<br>(0.150)<br>[0.550]     | 0.0879<br>(1.571)<br>[0.956]    |
| Financial City                                          | 1.257***<br>(0.409)<br>[0.004] | 9.324**<br>(4.598)<br>[0.049] | 14.53**<br>(6.877)<br>[0.041] | 16.95**<br>(7.777)<br>[0.035]  | 7.203*<br>(3.930)<br>[0.074] | 8.353*<br>(4.547)<br>[0.073]  | 19.46*<br>(11.00)<br>[0.087]    | 0.787**<br>(0.319)<br>[0.018]    | 0.823<br>(1.692)<br>[0.629]     |
| Country Dummies                                         | Yes                            | Yes                           | Yes                           | Yes                            | Yes                          | Yes                           | Yes                             | Yes                              | Yes                             |
| Volatility $t - 1$ and $t - 2$                          | Yes                            | Yes                           | Yes                           | Yes                            | Yes                          | Yes                           | Yes                             | Yes                              | Yes                             |
| $R^2$                                                   | 0.005                          | 0.013                         | 0.016                         | 0.017                          | 0.014                        | 0.015                         | 0.066                           | 0.005                            | 0.005                           |
| Observations                                            | 6708                           | 6708                          | 6708                          | 6708                           | 6278                         | 6278                          | 4714                            | 6708                             | 6708                            |

  

|                                | (10)                         | (11)                         | (12)                          | (13)                          | (14)                          | (15)                            | (16)                          | (17)                         |
|--------------------------------|------------------------------|------------------------------|-------------------------------|-------------------------------|-------------------------------|---------------------------------|-------------------------------|------------------------------|
| Volatility                     | -0.817<br>(0.889)<br>[0.363] | 0.383<br>(1.643)<br>[0.817]  | 50.18<br>(146.1)<br>[0.733]   | 57.88<br>(151.7)<br>[0.705]   | 0.0934<br>(0.152)<br>[0.541]  | -0.0131<br>(0.00866)<br>[0.139] | 0.219**<br>(0.104)<br>[0.041] | 0.494*<br>(0.277)<br>[0.082] |
| Volatility*Financial City      | 2.278<br>(2.282)<br>[0.324]  | 4.106<br>(3.696)<br>[0.273]  | -830.5*<br>(472.1)<br>[0.086] | -852.5*<br>(489.9)<br>[0.089] | -0.909*<br>(0.530)<br>[0.094] | 0.0371<br>(0.0228)<br>[0.111]   | -0.508*<br>(0.291)<br>[0.088] | -1.400<br>(0.922)<br>[0.137] |
| Financial City                 | -1.798<br>(2.712)<br>[0.511] | -3.999<br>(4.393)<br>[0.368] | 5.593**<br>(2.746)<br>[0.048] | 5.703*<br>(2.837)<br>[0.051]  | 14.48*<br>(7.988)<br>[0.077]  | -3.218<br>(1.974)<br>[0.111]    | 22.50*<br>(12.42)<br>[0.077]  | 25.59<br>(16.34)<br>[0.125]  |
| Country Dummies                | Yes                          | Yes                          | Yes                           | Yes                           | Yes                           | Yes                             | Yes                           | Yes                          |
| Volatility $t - 1$ and $t - 2$ | Yes                          | Yes                          | Yes                           | Yes                           | Yes                           | Yes                             | Yes                           | Yes                          |
| $R^2$                          | 0.006                        | 0.005                        | 0.008                         | 0.008                         | 0.009                         | 0.002                           | 0.015                         | 0.010                        |
| Observations                   | 6708                         | 6708                         | 6278                          | 6278                          | 6278                          | 15738                           | 6278                          | 6278                         |

Robust standard errors in parentheses, clustered at the city-level and p-values in squared brackets. Statistical significance levels: \*  $p < 0.1$ , \*\*  $p < 0.05$ , \*\*\*  $p < 0.01$ .

The following volatility measures are used in the different specifications: daily returns squared (1), 2-weeks rolling window standard deviation (2), GARCH estimated volatility (3), EGARCH estimated volatility (4), realized volatility with intraday average computed every 10 minutes (5), realized volatility with intraday average computed every 5 minutes (6), option implied volatility index (7), US daily returns squared (8), US volatility within 2-weeks rolling window (9), US GARCH estimated volatility (10), US EGARCH estimated volatility (11), US realized volatility with intraday average computed every 10 minutes (12), US realized volatility with intraday average computed every 5 minutes (13), US option implied volatility index (14), Economic Policy Uncertainty Index (15), US oil option implied volatility index (16) and US gold option implied volatility index (17).

## C.2 Contemporaneous Volatility

Table C.2: China - Contemporaneous Volatility

| Dependent variable: Online Pornographic Videos Accesses |          |          |          |          |           |           |
|---------------------------------------------------------|----------|----------|----------|----------|-----------|-----------|
| Independent variable: Volatility Measures               |          |          |          |          |           |           |
|                                                         | Vol1     | Vol2     | Vol3     | Vol4     | Vol5      | Vol6      |
| Beijing                                                 | 3.863**  | 45.75*** | 101.0*** | 103.4*** | 6032.3*** | 6122.2*** |
|                                                         | (1.589)  | (7.581)  | (10.94)  | (11.42)  | (1123.3)  | (1090.9)  |
| $R^2$                                                   | 0.015    | 0.077    | 0.228    | 0.183    | 0.214     | 0.219     |
| Observations                                            | 260      | 260      | 260      | 260      | 242       | 242       |
| Guangzhou                                               | 2.330**  | 24.93*** | 39.55*** | 27.92*** | 3246.4*** | 3163.0*** |
|                                                         | (1.149)  | (5.522)  | (6.601)  | (9.094)  | (540.2)   | (533.4)   |
| $R^2$                                                   | 0.012    | 0.050    | 0.076    | 0.029    | 0.139     | 0.131     |
| Observations                                            | 260      | 260      | 260      | 260      | 242       | 242       |
| Hong Kong                                               | 0.236    | 2.869**  | 7.442*** | 10.75*** | 201.1**   | 212.5***  |
|                                                         | (0.208)  | (1.223)  | (2.222)  | (2.587)  | (81.45)   | (80.65)   |
| $R^2$                                                   | 0.003    | 0.018    | 0.073    | 0.117    | 0.015     | 0.016     |
| Observations                                            | 260      | 260      | 260      | 260      | 242       | 242       |
| Shanghai                                                | -0.407   | -9.587** | -2.968   | -12.91** | 1035.4*** | 985.9***  |
|                                                         | (0.675)  | (4.199)  | (4.739)  | (5.321)  | (382.2)   | (368.1)   |
| $R^2$                                                   | 0.001    | 0.015    | 0.001    | 0.013    | 0.029     | 0.026     |
| Observations                                            | 260      | 260      | 260      | 260      | 242       | 242       |
| Shenzhen                                                | 1.228    | 12.54*** | 32.34*** | 32.82*** | 2038.6*** | 2071.9*** |
|                                                         | (0.833)  | (4.143)  | (5.649)  | (6.455)  | (470.3)   | (473.0)   |
| $R^2$                                                   | 0.005    | 0.018    | 0.074    | 0.059    | 0.079     | 0.081     |
| Observations                                            | 260      | 260      | 260      | 260      | 242       | 242       |
| Tianjin                                                 | 6.056*** | 68.72*** | 150.7*** | 164.7*** | 8130.5*** | 8364.2*** |
|                                                         | (2.071)  | (9.239)  | (15.99)  | (16.28)  | (1470.8)  | (1409.6)  |
| $R^2$                                                   | 0.022    | 0.105    | 0.307    | 0.282    | 0.235     | 0.246     |
| Observations                                            | 260      | 260      | 260      | 260      | 242       | 242       |

Robust standard errors in parentheses. Statistical significance levels: \*  $p < 0.1$ , \*\*  $p < 0.05$ , \*\*\*  $p < 0.01$ .

The following volatility measures are used in the different specifications: daily returns squared (Vol1), 2-weeks rolling window standard deviation (Vol2), GARCH estimated volatility (Vol3), EGARCH estimated volatility (Vol4), realized volatility with intraday average computed every 10 minutes (Vol5) and realized volatility with intraday average computed every 5 minutes (Vol6).

Table C.3: France - Contemporaneous Volatility

| Dependent variable: Online Pornographic Videos Accesses |                     |                      |                      |                      |                       |                       |                      |
|---------------------------------------------------------|---------------------|----------------------|----------------------|----------------------|-----------------------|-----------------------|----------------------|
| Independent variable: Volatility Measures               |                     |                      |                      |                      |                       |                       |                      |
|                                                         | Vol1                | Vol2                 | Vol3                 | Vol4                 | Vol5                  | Vol6                  | Vol7                 |
| Lyon                                                    | 0.168<br>(0.162)    | 2.440***<br>(0.833)  | 2.952***<br>(0.876)  | 3.360***<br>(0.948)  | 457.0***<br>(172.7)   | 479.2***<br>(169.7)   | 0.864***<br>(0.0983) |
| $R^2$                                                   | 0.004               | 0.016                | 0.020                | 0.024                | 0.022                 | 0.025                 | 0.135                |
| Observations                                            | 260                 | 260                  | 260                  | 260                  | 257                   | 257                   | 257                  |
| Marseille                                               | 0.241*<br>(0.124)   | 5.156***<br>(1.021)  | 5.460***<br>(1.187)  | 5.440***<br>(1.354)  | 320.8*<br>(190.2)     | 286.8<br>(191.3)      | 0.617***<br>(0.177)  |
| $R^2$                                                   | 0.009               | 0.078                | 0.073                | 0.067                | 0.011                 | 0.010                 | 0.074                |
| Observations                                            | 260                 | 260                  | 260                  | 260                  | 257                   | 257                   | 257                  |
| Nice                                                    | 0.161*<br>(0.0926)  | 3.665***<br>(0.775)  | 4.028***<br>(0.861)  | 4.197***<br>(0.940)  | 338.2**<br>(157.2)    | 310.5**<br>(148.9)    | 0.528***<br>(0.131)  |
| $R^2$                                                   | 0.006               | 0.054                | 0.054                | 0.054                | 0.017                 | 0.016                 | 0.074                |
| Observations                                            | 260                 | 260                  | 260                  | 260                  | 257                   | 257                   | 257                  |
| Paris                                                   | -0.559**<br>(0.256) | -11.75***<br>(1.230) | -13.69***<br>(1.649) | -14.26***<br>(1.661) | -1650.2***<br>(291.8) | -1710.7***<br>(286.0) | -1.535***<br>(0.142) |
| $R^2$                                                   | 0.042               | 0.341                | 0.386                | 0.384                | 0.250                 | 0.290                 | 0.381                |
| Observations                                            | 260                 | 260                  | 260                  | 260                  | 257                   | 257                   | 257                  |
| Toulouse                                                | 0.425<br>(0.282)    | 10.07***<br>(1.175)  | 11.58***<br>(1.406)  | 12.93***<br>(1.525)  | 1402.7***<br>(327.8)  | 1375.9***<br>(311.5)  | 1.586***<br>(0.133)  |
| $R^2$                                                   | 0.018               | 0.186                | 0.205                | 0.234                | 0.138                 | 0.143                 | 0.310                |
| Observations                                            | 260                 | 260                  | 260                  | 260                  | 257                   | 257                   | 257                  |

Robust standard errors in parentheses. Statistical significance levels: \*  $p < 0.1$ , \*\*  $p < 0.05$ , \*\*\*  $p < 0.01$ .

The following volatility measures are used in the different specifications: daily returns squared (Vol1), 2-weeks rolling window standard deviation (Vol2), GARCH estimated volatility (Vol3), EGARCH estimated volatility (Vol4), realized volatility with intraday average computed every 10 minutes (Vol5), realized volatility with intraday average computed every 5 minutes (Vol6) and option implied volatility index (Vol7).

Table C.4: Germany - Contemporaneous Volatility

| Dependent variable: Online Pornographic Videos Accesses |                                           |           |           |           |            |            |           |
|---------------------------------------------------------|-------------------------------------------|-----------|-----------|-----------|------------|------------|-----------|
|                                                         | Independent variable: Volatility Measures |           |           |           |            |            |           |
|                                                         | Vol1                                      | Vol2      | Vol3      | Vol4      | Vol5       | Vol6       | Vol7      |
| Berlin                                                  | -0.124*                                   | -0.919    | -1.601*   | -1.737*   | -272.8***  | -243.7***  | -0.0889   |
|                                                         | (0.0723)                                  | (0.697)   | (0.939)   | (0.944)   | (83.41)    | (81.90)    | (0.0826)  |
| $R^2$                                                   | 0.003                                     | 0.004     | 0.008     | 0.009     | 0.022      | 0.017      | 0.004     |
| Observations                                            | 260                                       | 260       | 260       | 260       | 255        | 255        | 255       |
| Frankfurt                                               | -2.819**                                  | -50.79*** | -67.49*** | -73.68*** | -6069.8*** | -6101.7*** | -5.914*** |
|                                                         | (1.322)                                   | (4.666)   | (6.557)   | (5.783)   | (927.7)    | (917.7)    | (0.407)   |
| $R^2$                                                   | 0.050                                     | 0.390     | 0.425     | 0.483     | 0.305      | 0.303      | 0.477     |
| Observations                                            | 260                                       | 260       | 260       | 260       | 255        | 255        | 255       |
| Hamburg                                                 | -0.320**                                  | -5.300*** | -7.477*** | -7.145*** | -792.8***  | -772.9***  | -0.535*** |
|                                                         | (0.130)                                   | (0.904)   | (1.241)   | (1.048)   | (135.8)    | (132.2)    | (0.0841)  |
| $R^2$                                                   | 0.015                                     | 0.099     | 0.121     | 0.105     | 0.120      | 0.112      | 0.090     |
| Observations                                            | 260                                       | 260       | 260       | 260       | 255        | 255        | 255       |
| Munich                                                  | -0.405***                                 | -4.747*** | -6.548*** | -6.714*** | -599.3***  | -608.6***  | -0.548*** |
|                                                         | (0.111)                                   | (0.566)   | (0.771)   | (0.710)   | (87.06)    | (84.41)    | (0.0578)  |
| $R^2$                                                   | 0.043                                     | 0.141     | 0.166     | 0.167     | 0.123      | 0.125      | 0.170     |
| Observations                                            | 260                                       | 260       | 260       | 260       | 255        | 255        | 255       |

Robust standard errors in parentheses. Statistical significance levels: \*  $p < 0.1$ , \*\*  $p < 0.05$ , \*\*\*  $p < 0.01$ .

The following volatility measures are used in the different specifications: daily returns squared (Vol1), 2-weeks rolling window standard deviation (Vol2), GARCH estimated volatility (Vol3), EGARCH estimated volatility (Vol4), realized volatility with intraday average computed every 10 minutes (Vol5), realized volatility with intraday average computed every 5 minutes (Vol6) and option implied volatility index (Vol7).

Table C.5: Italy - Contemporaneous Volatility

| Dependent variable: Online Pornographic Videos Accesses |           |           |           |          |            |            |
|---------------------------------------------------------|-----------|-----------|-----------|----------|------------|------------|
| Independent variable: Volatility Measures               |           |           |           |          |            |            |
|                                                         | Vol1      | Vol2      | Vol3      | Vol4     | Vol5       | Vol6       |
| Milan                                                   | -0.0804** | -2.693*** | -1.941*** | -1.746** | -379.9***  | -385.0***  |
|                                                         | (0.0374)  | (0.500)   | (0.589)   | (0.733)  | (103.8)    | (102.9)    |
| $R^2$                                                   | 0.010     | 0.063     | 0.029     | 0.021    | 0.031      | 0.032      |
| Observations                                            | 260       | 260       | 260       | 260      | 256        | 256        |
| Naples                                                  | -0.117    | -5.077*** | -3.543*** | -2.902** | -1195.1*** | -1260.0*** |
|                                                         | (0.0810)  | (0.833)   | (1.157)   | (1.451)  | (124.7)    | (131.5)    |
| $R^2$                                                   | 0.016     | 0.174     | 0.074     | 0.046    | 0.235      | 0.264      |
| Observations                                            | 260       | 260       | 260       | 260      | 256        | 256        |
| Rome                                                    | -0.125    | -5.306*** | -4.173*** | -3.645** | -1200.2*** | -1234.7*** |
|                                                         | (0.0868)  | (0.878)   | (1.270)   | (1.699)  | (121.1)    | (122.6)    |
| $R^2$                                                   | 0.021     | 0.213     | 0.116     | 0.082    | 0.265      | 0.284      |
| Observations                                            | 260       | 260       | 260       | 260      | 256        | 256        |
| Turin                                                   | -0.210*   | -8.447*** | -6.286*** | -5.410** | -1681.7*** | -1749.4*** |
|                                                         | (0.121)   | (1.092)   | (1.754)   | (2.372)  | (172.6)    | (180.7)    |
| $R^2$                                                   | 0.024     | 0.220     | 0.107     | 0.073    | 0.212      | 0.232      |
| Observations                                            | 260       | 260       | 260       | 260      | 256        | 256        |

Robust standard errors in parentheses. Statistical significance levels: \*  $p < 0.1$ , \*\*  $p < 0.05$ , \*\*\*  $p < 0.01$ .

The following volatility measures are used in the different specifications: daily returns squared (Vol1), 2-weeks rolling window standard deviation (Vol2), GARCH estimated volatility (Vol3), EGARCH estimated volatility (Vol4), realized volatility with intraday average computed every 10 minutes (Vol5) and realized volatility with intraday average computed every 5 minutes (Vol6).



Table C.6: Japan - Contemporaneous Volatility

| Dependent variable: Online Pornographic Videos Accesses |                                           |                     |                     |                      |                     |                     |                      |
|---------------------------------------------------------|-------------------------------------------|---------------------|---------------------|----------------------|---------------------|---------------------|----------------------|
|                                                         | Independent variable: Volatility Measures |                     |                     |                      |                     |                     |                      |
|                                                         | Vol1                                      | Vol2                | Vol3                | Vol4                 | Vol5                | Vol6                | Vol7                 |
| Nagoya                                                  | 0.187**<br>(0.0922)                       | 3.992***<br>(0.688) | 4.786***<br>(0.869) | 3.299***<br>(0.997)  | 323.0***<br>(102.4) | 407.8***<br>(121.4) | 0.337***<br>(0.0888) |
| $R^2$                                                   | 0.018                                     | 0.109               | 0.113               | 0.043                | 0.063               | 0.071               | 0.047                |
| Observations                                            | 260                                       | 260                 | 260                 | 260                  | 242                 | 242                 | 243                  |
| Osaka                                                   | 0.0537<br>(0.0764)                        | 1.138<br>(0.702)    | 1.305<br>(0.854)    | 0.0415<br>(0.943)    | 26.68<br>(81.11)    | 19.90<br>(96.99)    | -0.112<br>(0.101)    |
| $R^2$                                                   | 0.001                                     | 0.009               | 0.008               | 0.000                | 0.000               | 0.000               | 0.005                |
| Observations                                            | 260                                       | 260                 | 260                 | 260                  | 242                 | 242                 | 243                  |
| Tokyo                                                   | 0.0128<br>(0.0878)                        | -0.562<br>(0.775)   | -0.348<br>(0.948)   | -3.067***<br>(1.085) | -65.42<br>(94.91)   | -96.35<br>(116.0)   | -0.388***<br>(0.108) |
| $R^2$                                                   | 0.000                                     | 0.002               | 0.001               | 0.032                | 0.002               | 0.004               | 0.056                |
| Observations                                            | 260                                       | 260                 | 260                 | 260                  | 242                 | 242                 | 243                  |
| Yokohama                                                | 0.256**<br>(0.120)                        | 6.416***<br>(0.878) | 7.299***<br>(1.112) | 10.07***<br>(1.227)  | 443.7***<br>(145.4) | 562.7***<br>(173.9) | 0.886***<br>(0.111)  |
| $R^2$                                                   | 0.022                                     | 0.186               | 0.174               | 0.263                | 0.078               | 0.089               | 0.212                |
| Observations                                            | 260                                       | 260                 | 260                 | 260                  | 242                 | 242                 | 243                  |

Robust standard errors in parentheses. Statistical significance levels: \*  $p < 0.1$ , \*\*  $p < 0.05$ , \*\*\*  $p < 0.01$ .

The following volatility measures are used in the different specifications: daily returns squared (Vol1), 2-weeks rolling window standard deviation (Vol2), GARCH estimated volatility (Vol3), EGARCH estimated volatility (Vol4), realized volatility with intraday average computed every 10 minutes (Vol5), realized volatility with intraday average computed every 5 minutes (Vol6) and option implied volatility index (Vol7).

Table C.7: Singapore - Contemporaneous Volatility

| Dependent variable: Online Pornographic Videos Accesses |                  |                     |                     |                     |                    |                     |
|---------------------------------------------------------|------------------|---------------------|---------------------|---------------------|--------------------|---------------------|
| Independent variable: Volatility Measures               |                  |                     |                     |                     |                    |                     |
|                                                         | Vol1             | Vol2                | Vol3                | Vol4                | Vol5               | Vol6                |
| Singapore                                               | 0.282<br>(0.177) | 3.871***<br>(0.793) | 5.322***<br>(1.124) | 5.547***<br>(0.917) | 460.8**<br>(184.7) | 589.9***<br>(205.6) |
| $R^2$                                                   | 0.005            | 0.064               | 0.069               | 0.084               | 0.037              | 0.045               |
| Observations                                            | 260              | 260                 | 260                 | 260                 | 251                | 251                 |

Robust standard errors in parentheses. Statistical significance levels: \*  $p < 0.1$ , \*\*  $p < 0.05$ , \*\*\*  $p < 0.01$ . The following volatility measures are used in the different specifications: daily returns squared (Vol1), 2-weeks rolling window standard deviation (Vol2), GARCH estimated volatility (Vol3), EGARCH estimated volatility (Vol4), realized volatility with intraday average computed every 10 minutes (Vol5) and realized volatility with intraday average computed every 5 minutes (Vol6).

Table C.8: Switzerland - Contemporaneous Volatility

| Dependent variable: Online Pornographic Videos Accesses |                      |                      |                      |                      |                      |                       |                       |
|---------------------------------------------------------|----------------------|----------------------|----------------------|----------------------|----------------------|-----------------------|-----------------------|
| Independent variable: Volatility Measures               |                      |                      |                      |                      |                      |                       |                       |
|                                                         | Vol1                 | Vol2                 | Vol3                 | Vol4                 | Vol5                 | Vol6                  | Vol7                  |
| Bern                                                    | -1.043***<br>(0.355) | -7.306***<br>(1.252) | -10.68***<br>(1.752) | -7.513***<br>(1.925) | -780.5***<br>(232.3) | -906.2***<br>(230.2)  | -0.327**<br>(0.137)   |
| $R^2$                                                   | 0.025                | 0.086                | 0.084                | 0.042                | 0.054                | 0.063                 | 0.020                 |
| Observations                                            | 260                  | 260                  | 260                  | 260                  | 253                  | 253                   | 253                   |
| Zurich                                                  | -1.018***<br>(0.210) | -8.055***<br>(0.710) | -12.18***<br>(1.132) | -9.819***<br>(1.196) | -985.2***<br>(170.9) | -1140.8***<br>(158.9) | -0.650***<br>(0.0926) |
| $R^2$                                                   | 0.047                | 0.211                | 0.220                | 0.147                | 0.172                | 0.199                 | 0.157                 |
| Observations                                            | 260                  | 260                  | 260                  | 260                  | 253                  | 253                   | 253                   |

Robust standard errors in parentheses. Statistical significance levels: \*  $p < 0.1$ , \*\*  $p < 0.05$ , \*\*\*  $p < 0.01$ .

The following volatility measures are used in the different specifications: daily returns squared (Vol1), 2-weeks rolling window standard deviation (Vol2), GARCH estimated volatility (Vol3), EGARCH estimated volatility (Vol4), realized volatility with intraday average computed every 10 minutes (Vol5), realized volatility with intraday average computed every 5 minutes (Vol6) and option implied volatility index (Vol7).

Table C.9: United Kingdom - Contemporaneous Volatility

| Dependent variable: Online Pornographic Videos Accesses |           |           |           |           |           |           |           |
|---------------------------------------------------------|-----------|-----------|-----------|-----------|-----------|-----------|-----------|
| Independent variable: Volatility Measures               |           |           |           |           |           |           |           |
|                                                         | Vol1      | Vol2      | Vol3      | Vol4      | Vol5      | Vol6      | Vol7      |
| Birmingham                                              | 0.0181    | 1.362**   | 1.204     | 3.264**   | 4.244     | 19.57     | 0.194**   |
|                                                         | (0.180)   | (0.685)   | (0.964)   | (1.363)   | (65.43)   | (84.23)   | (0.0758)  |
| $R^2$                                                   | 0.000     | 0.012     | 0.005     | 0.026     | 0.000     | 0.000     | 0.026     |
| Observations                                            | 260       | 260       | 260       | 260       | 252       | 252       | 257       |
| Glasgow                                                 | -0.385*   | -4.545*** | -5.254*** | -6.001*** | -74.09    | -104.2    | -0.190**  |
|                                                         | (0.213)   | (0.713)   | (0.980)   | (1.296)   | (71.53)   | (89.23)   | (0.0875)  |
| $R^2$                                                   | 0.012     | 0.106     | 0.078     | 0.072     | 0.006     | 0.009     | 0.019     |
| Observations                                            | 260       | 260       | 260       | 260       | 252       | 252       | 257       |
| Leeds                                                   | -1.004*** | -8.373*** | -10.48*** | -11.79*** | -294.3**  | -402.8*** | -0.690*** |
|                                                         | (0.173)   | (0.838)   | (1.113)   | (1.335)   | (119.7)   | (150.0)   | (0.0791)  |
| $R^2$                                                   | 0.039     | 0.176     | 0.152     | 0.136     | 0.048     | 0.064     | 0.125     |
| Observations                                            | 260       | 260       | 260       | 260       | 252       | 252       | 257       |
| London                                                  | -0.440*** | -2.334*** | -3.255*** | -3.014*** | -123.6*** | -144.3*** | -0.166*** |
|                                                         | (0.128)   | (0.509)   | (0.639)   | (0.913)   | (26.23)   | (35.93)   | (0.0511)  |
| $R^2$                                                   | 0.026     | 0.048     | 0.051     | 0.031     | 0.030     | 0.029     | 0.026     |
| Observations                                            | 260       | 260       | 260       | 260       | 252       | 252       | 257       |
| Sheffield                                               | -0.326*   | -1.739**  | -1.825*   | -1.359    | -84.79*   | -99.63*   | 0.0728    |
|                                                         | (0.184)   | (0.873)   | (1.056)   | (1.523)   | (44.37)   | (59.48)   | (0.0827)  |
| $R^2$                                                   | 0.006     | 0.012     | 0.007     | 0.003     | 0.006     | 0.006     | 0.002     |
| Observations                                            | 260       | 260       | 260       | 260       | 252       | 252       | 257       |

Robust standard errors in parentheses. Statistical significance levels: \*  $p < 0.1$ , \*\*  $p < 0.05$ , \*\*\*  $p < 0.01$ .

The following volatility measures are used in the different specifications: daily returns squared (Vol1), 2-weeks rolling window standard deviation (Vol2), GARCH estimated volatility (Vol3), EGARCH estimated volatility (Vol4), realized volatility with intraday average computed every 10 minutes (Vol5), realized volatility with intraday average computed every 5 minutes (Vol6) and option implied volatility index (Vol7).

Table C.10: United States - Contemporaneous Volatility

| Dependent variable: Online Pornographic Videos Accesses |                                           |                      |                     |                     |                       |                       |                       |
|---------------------------------------------------------|-------------------------------------------|----------------------|---------------------|---------------------|-----------------------|-----------------------|-----------------------|
| Independent variable: Volatility Measures               | Independent variable: Volatility Measures |                      |                     |                     |                       |                       |                       |
|                                                         | Vol1                                      | Vol2                 | Vol3                | Vol4                | Vol5                  | Vol6                  | Vol7                  |
| Chicago                                                 | -0.0167<br>(0.393)                        | 0.837<br>(2.275)     | -1.788<br>(5.433)   | -2.822<br>(6.516)   | -1678.8***<br>(315.8) | -1717.7***<br>(332.7) | -1.447***<br>(0.222)  |
| $R^2$                                                   | 0.000                                     | 0.001                | 0.000               | 0.001               | 0.128                 | 0.134                 | 0.121                 |
| Observations                                            | 260                                       | 260                  | 260                 | 260                 | 251                   | 251                   | 251                   |
| Dallas                                                  | -0.440<br>(0.528)                         | -4.771<br>(2.894)    | -10.10<br>(7.331)   | -9.629<br>(8.529)   | -2666.3***<br>(441.1) | -2770.5***<br>(478.7) | -2.528***<br>(0.288)  |
| $R^2$                                                   | 0.004                                     | 0.012                | 0.010               | 0.007               | 0.211                 | 0.228                 | 0.241                 |
| Observations                                            | 260                                       | 260                  | 260                 | 260                 | 251                   | 251                   | 251                   |
| Houston                                                 | 0.301<br>(0.392)                          | 5.470**<br>(2.627)   | 8.167<br>(5.877)    | 10.19<br>(6.820)    | 2291.8***<br>(465.3)  | 2344.0***<br>(501.2)  | 2.277***<br>(0.254)   |
| $R^2$                                                   | 0.002                                     | 0.017                | 0.007               | 0.008               | 0.168                 | 0.176                 | 0.210                 |
| Observations                                            | 260                                       | 260                  | 260                 | 260                 | 251                   | 251                   | 251                   |
| Los Angeles                                             | -0.294<br>(0.208)                         | -2.844**<br>(1.190)  | -6.127**<br>(2.839) | -4.352<br>(3.426)   | -487.5***<br>(120.4)  | -492.4***<br>(119.4)  | -0.401***<br>(0.126)  |
| $R^2$                                                   | 0.008                                     | 0.018                | 0.015               | 0.006               | 0.031                 | 0.031                 | 0.026                 |
| Observations                                            | 260                                       | 260                  | 260                 | 260                 | 251                   | 251                   | 251                   |
| Miami                                                   | -0.529<br>(0.641)                         | -7.547**<br>(3.525)  | -12.83<br>(9.395)   | -10.62<br>(11.29)   | -2534.0***<br>(391.5) | -2647.6***<br>(414.3) | -2.238***<br>(0.333)  |
| $R^2$                                                   | 0.003                                     | 0.017                | 0.009               | 0.005               | 0.108                 | 0.118                 | 0.107                 |
| Observations                                            | 260                                       | 260                  | 260                 | 260                 | 251                   | 251                   | 251                   |
| New York                                                | -0.757*<br>(0.453)                        | -9.706***<br>(2.079) | -14.51**<br>(6.095) | -12.86**<br>(6.503) | -1116.9***<br>(231.9) | -1129.3***<br>(231.2) | -1.098***<br>(0.202)  |
| $R^2$                                                   | 0.012                                     | 0.050                | 0.020               | 0.012               | 0.037                 | 0.038                 | 0.046                 |
| Observations                                            | 260                                       | 260                  | 260                 | 260                 | 251                   | 251                   | 251                   |
| Philadelphia                                            | -0.289<br>(0.468)                         | -4.875*<br>(2.632)   | -7.890<br>(6.498)   | -9.414<br>(7.626)   | -2222.0***<br>(425.5) | -2297.4***<br>(463.7) | -2.072***<br>(0.261)  |
| $R^2$                                                   | 0.002                                     | 0.015                | 0.007               | 0.008               | 0.178                 | 0.190                 | 0.196                 |
| Observations                                            | 260                                       | 260                  | 260                 | 260                 | 251                   | 251                   | 251                   |
| Phoenix                                                 | -0.0823<br>(0.152)                        | -2.005**<br>(0.806)  | -2.477<br>(2.189)   | -2.805<br>(2.754)   | -328.9***<br>(86.68)  | -344.4***<br>(86.70)  | -0.272***<br>(0.0844) |
| $R^2$                                                   | 0.001                                     | 0.022                | 0.006               | 0.006               | 0.034                 | 0.037                 | 0.030                 |
| Observations                                            | 260                                       | 260                  | 260                 | 260                 | 251                   | 251                   | 251                   |
| San Antonio                                             | -0.915<br>(0.714)                         | -18.81***<br>(3.671) | -23.51**<br>(10.41) | -23.03*<br>(12.02)  | -2985.4***<br>(697.7) | -3165.9***<br>(759.8) | -3.206***<br>(0.473)  |
| $R^2$                                                   | 0.006                                     | 0.067                | 0.019               | 0.013               | 0.094                 | 0.106                 | 0.137                 |
| Observations                                            | 260                                       | 260                  | 260                 | 260                 | 251                   | 251                   | 251                   |
| San Diego                                               | 0.415**<br>(0.200)                        | 2.277<br>(1.445)     | 5.025<br>(3.226)    | 3.075<br>(4.076)    | 411.3**<br>(163.3)    | 406.8**<br>(164.2)    | 0.593***<br>(0.153)   |
| $R^2$                                                   | 0.010                                     | 0.007                | 0.007               | 0.002               | 0.014                 | 0.014                 | 0.037                 |
| Observations                                            | 260                                       | 260                  | 260                 | 260                 | 251                   | 251                   | 251                   |
| San Francisco                                           | -0.193<br>(0.322)                         | -3.394*<br>(1.795)   | -6.063<br>(4.618)   | -6.516<br>(5.508)   | -1464.1***<br>(276.0) | -1503.3***<br>(299.1) | -1.489***<br>(0.214)  |
| $R^2$                                                   | 0.002                                     | 0.015                | 0.009               | 0.008               | 0.162                 | 0.171                 | 0.213                 |
| Observations                                            | 260                                       | 260                  | 260                 | 260                 | 251                   | 251                   | 251                   |
| Washington                                              | -0.295<br>(0.397)                         | -0.376<br>(2.168)    | -4.064<br>(5.344)   | -0.767<br>(6.228)   | -1289.5***<br>(208.5) | -1323.9***<br>(202.7) | -1.296***<br>(0.215)  |
| $R^2$                                                   | 0.003                                     | 0.000                | 0.003               | 0.000               | 0.087                 | 0.092                 | 0.112                 |
| Observations                                            | 260                                       | 260                  | 260                 | 260                 | 251                   | 251                   | 251                   |

Robust standard errors in parentheses. Statistical significance levels: \*  $p < 0.1$ , \*\*  $p < 0.05$ , \*\*\*  $p < 0.01$ . The following volatility measures are used in the different specifications: daily returns squared (Vol1), 2-weeks rolling window standard deviation (Vol2), GARCH estimated volatility (Vol3), EGARCH estimated volatility (Vol4), realized volatility with intraday average computed every 10 minutes (Vol5), realized volatility with intraday average computed every 5 minutes (Vol6) and option implied volatility index (Vol7).

Figure C.1: Distribution of financial stress coefficient estimates by city type (controlling for serial correlation)

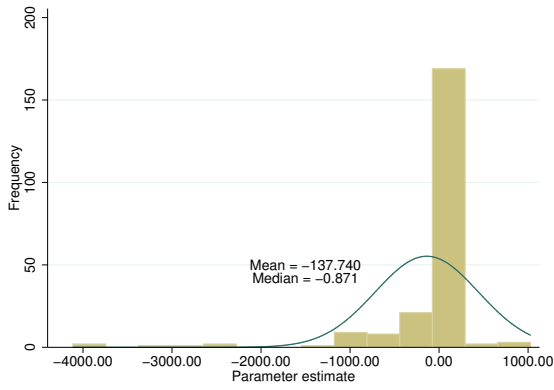

(a) Financial cities

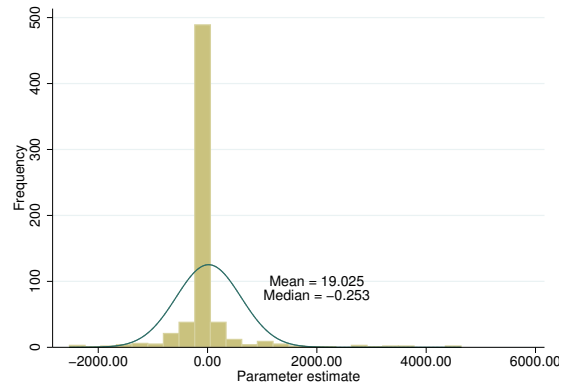

(b) Non-financial cities

Figure C.2: Distribution of financial stress coefficient estimates by city type (excluding volatility measures 5 and 6)

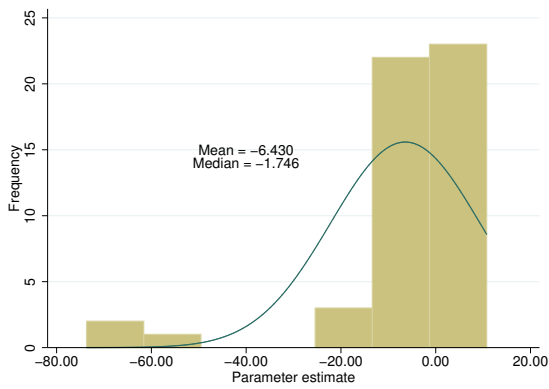

(a) Financial cities

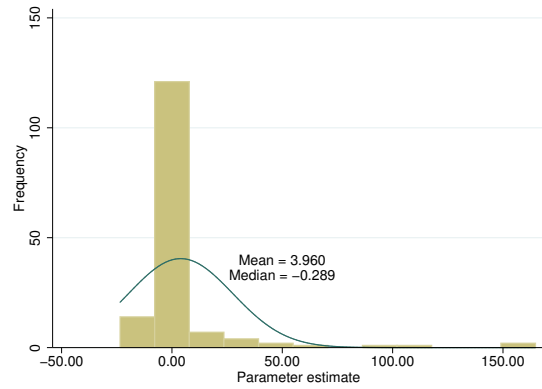

(b) Non-financial cities

Figure C.3: Distribution of financial stress coefficient estimates by city type (trimming extreme values)

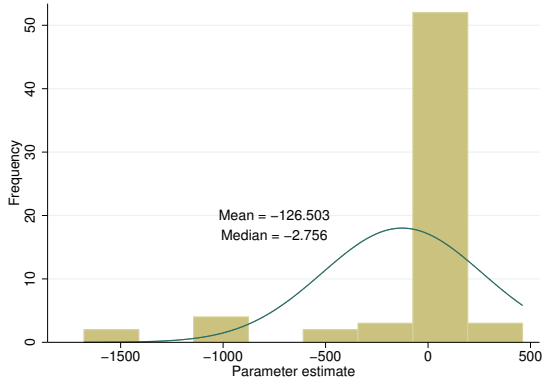

(a) Financial cities

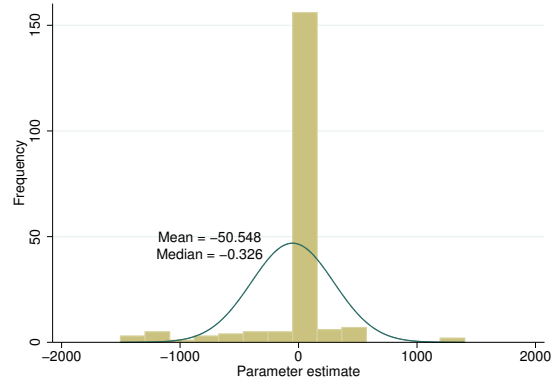

(b) Non-financial cities

Figure C.4: Distribution of financial stress coefficient estimates by city type (normalized coefficients)

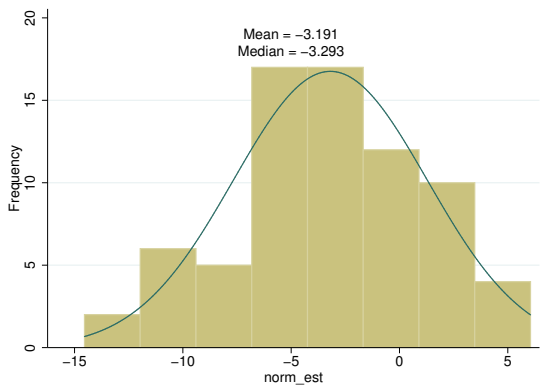

(a) Financial cities

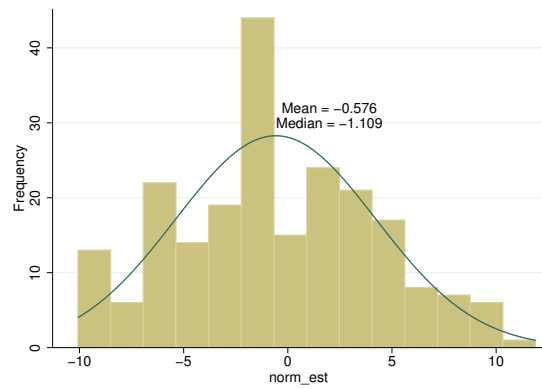

(b) Non-financial cities

### C.3 Controlling for seasonal trends

Figure C.5: Distribution of financial stress coefficient estimates by city type (all estimates, Winter/Autumn)

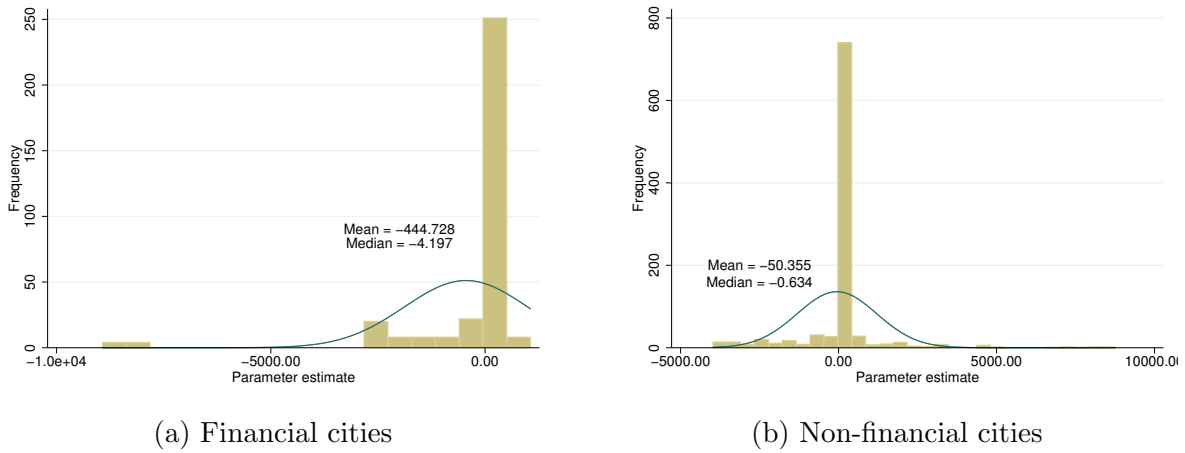

Figure C.6: Distribution of financial stress coefficient estimates by city type (all estimates, Spring/Summer)

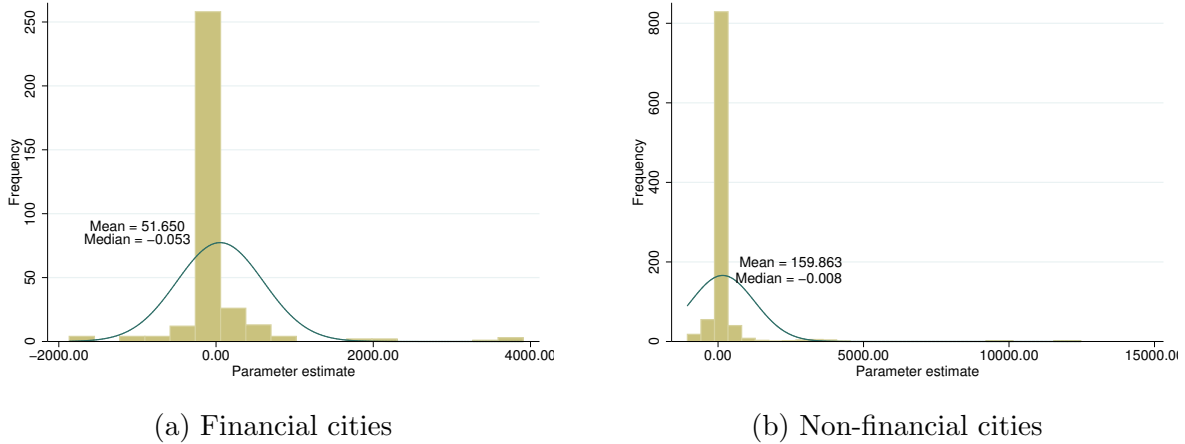

Figure C.7: Distribution of financial stress coefficient estimates by city type (all estimates, controlling for quarters)

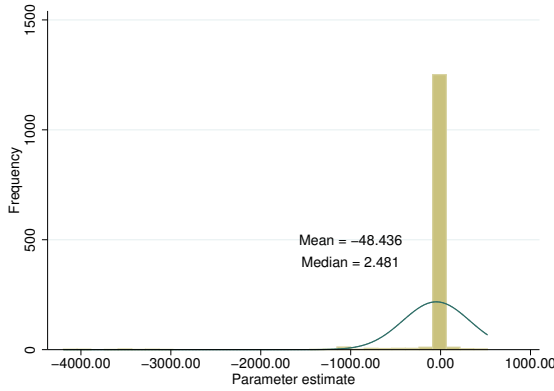

(a) Financial cities

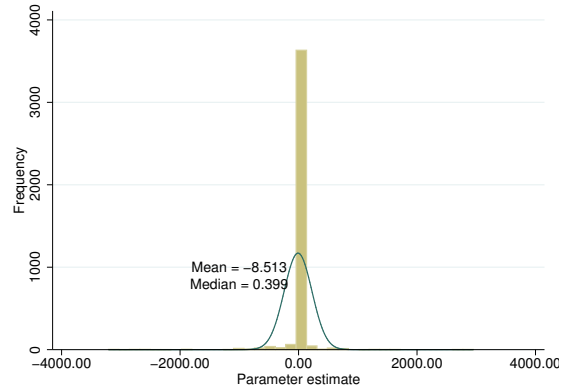

(b) Non-financial cities

## C.4 Controlling for trading days

Figure C.8: Distribution of financial stress coefficient estimates by city type (all estimates, controlling for trading days)

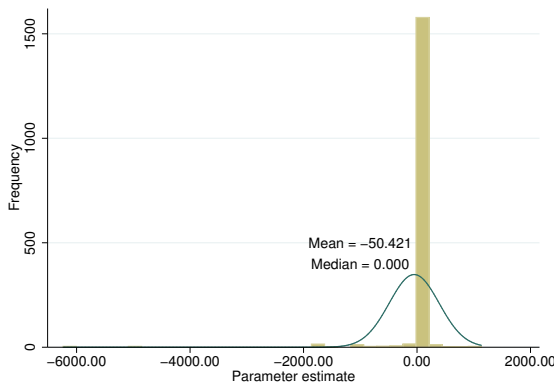

(a) Financial cities

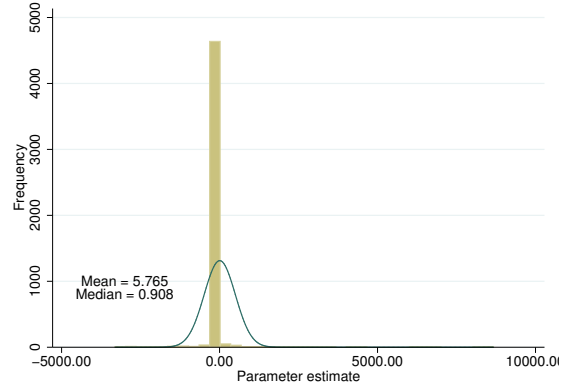

(b) Non-financial cities



### C.5 Controlling for seasonal trends and trading days

Figure C.9: Distribution of financial stress coefficient estimates by city type (all estimates, controlling for seasonal trends and trading days)

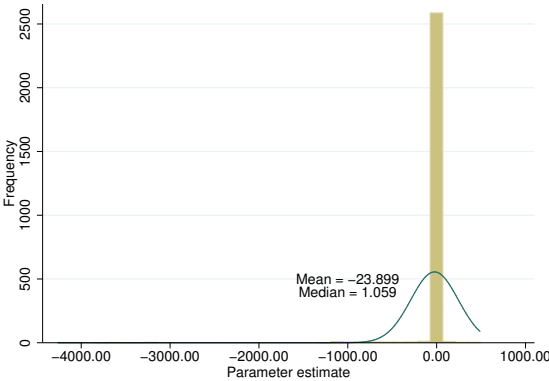

(a) Financial cities

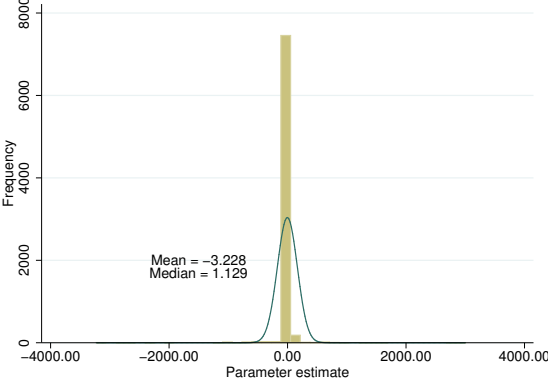

(b) Non-financial cities

### C.6 Controlling for city size

Figure C.10: Distribution of financial stress coefficient estimates by city type (all estimates, controlling for city size)

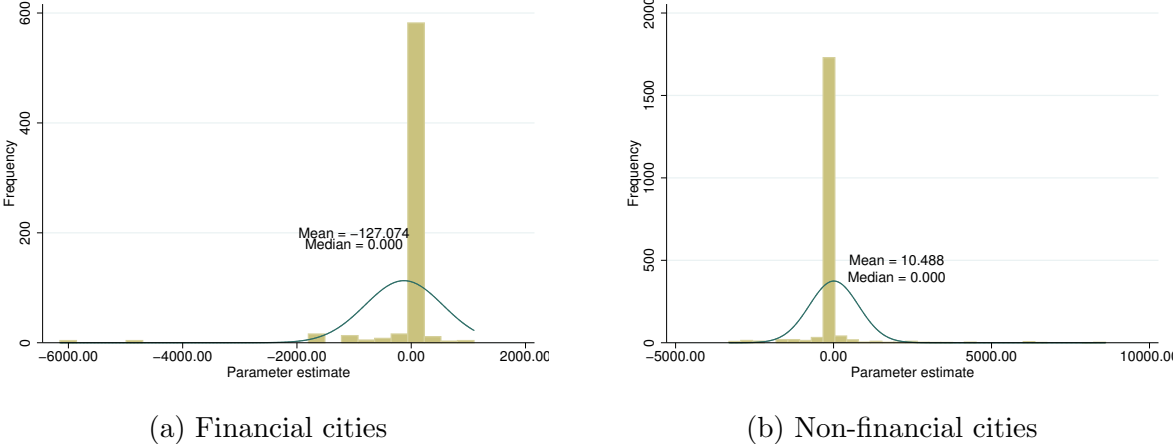

Note: City sizes come from the UN publication “The World’s Cities in 2016” and the UN data.

## C.7 Lagged Volatility

Table C.11: China - Lagged Volatility

| Dependent variable: Online Pornographic Videos Accesses |                     |                     |                     |                     |                       |                       |
|---------------------------------------------------------|---------------------|---------------------|---------------------|---------------------|-----------------------|-----------------------|
| Independent variable: Lagged Volatility Measures        |                     |                     |                     |                     |                       |                       |
|                                                         | Vol1                | Vol2                | Vol3                | Vol4                | Vol5                  | Vol6                  |
| Beijing                                                 | 4.069***<br>(1.505) | 46.75***<br>(7.367) | 100.3***<br>(10.78) | 103.1***<br>(11.24) | 6208.3***<br>(1093.4) | 6341.3***<br>(1043.6) |
| $R^2$                                                   | 0.017               | 0.081               | 0.228               | 0.185               | 0.226                 | 0.233                 |
| Observations                                            | 261                 | 261                 | 261                 | 261                 | 243                   | 243                   |
| Guangzhou                                               | 2.689**<br>(1.150)  | 24.98***<br>(5.392) | 39.22***<br>(6.512) | 28.69***<br>(8.867) | 3441.1***<br>(531.6)  | 3396.7***<br>(516.3)  |
| $R^2$                                                   | 0.016               | 0.050               | 0.076               | 0.031               | 0.156                 | 0.150                 |
| Observations                                            | 261                 | 261                 | 261                 | 261                 | 243                   | 243                   |
| Hong Kong                                               | 0.323*<br>(0.173)   | 3.260***<br>(1.252) | 8.240***<br>(2.072) | 11.84***<br>(2.443) | 265.3***<br>(85.18)   | 294.4***<br>(85.53)   |
| $R^2$                                                   | 0.006               | 0.022               | 0.088               | 0.139               | 0.024                 | 0.029                 |
| Observations                                            | 261                 | 261                 | 261                 | 261                 | 243                   | 243                   |
| Shanghai                                                | -0.264<br>(0.649)   | -9.902**<br>(4.220) | -2.642<br>(4.794)   | -12.02**<br>(5.289) | 1098.9***<br>(421.8)  | 1088.6***<br>(399.4)  |
| $R^2$                                                   | 0.000               | 0.016               | 0.001               | 0.011               | 0.031                 | 0.030                 |
| Observations                                            | 261                 | 261                 | 261                 | 261                 | 243                   | 243                   |
| Shenzhen                                                | 1.358*<br>(0.766)   | 12.47***<br>(4.221) | 32.32***<br>(5.623) | 32.88***<br>(6.365) | 2185.4***<br>(452.7)  | 2214.9***<br>(444.6)  |
| $R^2$                                                   | 0.006               | 0.018               | 0.073               | 0.058               | 0.085                 | 0.087                 |
| Observations                                            | 261                 | 261                 | 261                 | 261                 | 243                   | 243                   |
| Tianjin                                                 | 5.954***<br>(1.880) | 69.65***<br>(9.067) | 149.6***<br>(15.51) | 163.6***<br>(15.88) | 8332.2***<br>(1464.4) | 8608.4***<br>(1398.4) |
| $R^2$                                                   | 0.022               | 0.109               | 0.309               | 0.283               | 0.248                 | 0.261                 |
| Observations                                            | 261                 | 261                 | 261                 | 261                 | 243                   | 243                   |

Robust standard errors in parentheses. Statistical significance levels: \*  $p < 0.1$ , \*\*  $p < 0.05$ , \*\*\*  $p < 0.01$ .

The following 1-day lagged volatility measures are used in the different specifications: daily returns squared (Vol1), 2-weeks rolling window standard deviation (Vol2), GARCH estimated volatility (Vol3), EGARCH estimated volatility (Vol4), realized volatility with intraday average computed every 10 minutes (Vol5) and realized volatility with intraday average computed every 5 minutes (Vol6).

Table C.12: France - Lagged Volatility

| Dependent variable: Online Pornographic Videos Accesses |                     |                      |                      |                      |                       |                       |                      |
|---------------------------------------------------------|---------------------|----------------------|----------------------|----------------------|-----------------------|-----------------------|----------------------|
| Independent variable: Lagged Volatility Measures        |                     |                      |                      |                      |                       |                       |                      |
|                                                         | Vol1                | Vol2                 | Vol3                 | Vol4                 | Vol5                  | Vol6                  | Vol7                 |
| Lyon                                                    | 0.0508<br>(0.119)   | 2.075**<br>(0.826)   | 2.576***<br>(0.900)  | 2.876***<br>(0.966)  | 363.8**<br>(173.4)    | 392.0**<br>(169.3)    | 0.827***<br>(0.0989) |
| $R^2$                                                   | 0.000               | 0.012                | 0.016                | 0.018                | 0.014                 | 0.017                 | 0.127                |
| Observations                                            | 261                 | 261                  | 261                  | 261                  | 258                   | 258                   | 258                  |
| Marseille                                               | 0.204*<br>(0.104)   | 5.068***<br>(1.021)  | 5.299***<br>(1.137)  | 5.117***<br>(1.313)  | 309.9*<br>(181.5)     | 293.8<br>(182.4)      | 0.653***<br>(0.168)  |
| $R^2$                                                   | 0.007               | 0.078                | 0.072                | 0.061                | 0.011                 | 0.011                 | 0.086                |
| Observations                                            | 261                 | 261                  | 261                  | 261                  | 258                   | 258                   | 258                  |
| Nice                                                    | 0.0839<br>(0.0785)  | 3.162***<br>(0.749)  | 3.719***<br>(0.829)  | 3.939***<br>(0.899)  | 292.9*<br>(156.6)     | 280.5*<br>(143.0)     | 0.572***<br>(0.118)  |
| $R^2$                                                   | 0.002               | 0.043                | 0.050                | 0.051                | 0.014                 | 0.014                 | 0.093                |
| Observations                                            | 261                 | 261                  | 261                  | 261                  | 258                   | 258                   | 258                  |
| Paris                                                   | -0.673**<br>(0.289) | -11.90***<br>(1.271) | -13.68***<br>(1.651) | -14.28***<br>(1.670) | -1711.0***<br>(278.6) | -1768.6***<br>(275.0) | -1.494***<br>(0.138) |
| $R^2$                                                   | 0.060               | 0.348                | 0.384                | 0.385                | 0.268                 | 0.307                 | 0.360                |
| Observations                                            | 261                 | 261                  | 261                  | 261                  | 258                   | 258                   | 258                  |
| Toulouse                                                | 0.389<br>(0.278)    | 9.824***<br>(1.137)  | 11.25***<br>(1.350)  | 12.44***<br>(1.450)  | 1325.4***<br>(320.4)  | 1305.9***<br>(304.0)  | 1.591***<br>(0.133)  |
| $R^2$                                                   | 0.016               | 0.186                | 0.203                | 0.228                | 0.128                 | 0.134                 | 0.326                |
| Observations                                            | 261                 | 261                  | 261                  | 261                  | 258                   | 258                   | 258                  |

Robust standard errors in parentheses. Statistical significance levels: \*  $p < 0.1$ , \*\*  $p < 0.05$ , \*\*\*  $p < 0.01$ .

The following 1-day lagged volatility measures are used in the different specifications: daily returns squared (Vol1), 2-weeks rolling window standard deviation (Vol2), GARCH estimated volatility (Vol3), EGARCH estimated volatility (Vol4), realized volatility with intraday average computed every 10 minutes (Vol5), realized volatility with intraday average computed every 5 minutes (Vol6) and option implied volatility index (Vol7).

Table C.13: Germany - Lagged Volatility

| Dependent variable: Online Pornographic Videos Accesses |           |           |           |           |            |            |           |
|---------------------------------------------------------|-----------|-----------|-----------|-----------|------------|------------|-----------|
| Independent variable: Lagged Volatility Measures        |           |           |           |           |            |            |           |
|                                                         | Vol1      | Vol2      | Vol3      | Vol4      | Vol5       | Vol6       | Vol7      |
| Berlin                                                  | -0.153**  | -0.488    | -1.221    | -1.356    | -236.4**   | -215.7**   | -0.0581   |
|                                                         | (0.0624)  | (0.700)   | (0.915)   | (0.926)   | (95.33)    | (88.28)    | (0.0827)  |
| $R^2$                                                   | 0.005     | 0.001     | 0.005     | 0.006     | 0.016      | 0.013      | 0.002     |
| Observations                                            | 261       | 261       | 261       | 261       | 256        | 256        | 256       |
| Frankfurt                                               | -2.913**  | -51.11*** | -67.64*** | -73.71*** | -6094.5*** | -6149.1*** | -5.974*** |
|                                                         | (1.365)   | (4.635)   | (6.423)   | (5.626)   | (928.9)    | (921.0)    | (0.403)   |
| $R^2$                                                   | 0.053     | 0.390     | 0.424     | 0.484     | 0.302      | 0.303      | 0.482     |
| Observations                                            | 261       | 261       | 261       | 261       | 256        | 256        | 256       |
| Hamburg                                                 | -0.375**  | -5.013*** | -7.073*** | -6.705*** | -768.0***  | -755.3***  | -0.512*** |
|                                                         | (0.161)   | (0.957)   | (1.251)   | (1.074)   | (137.0)    | (130.7)    | (0.0833)  |
| $R^2$                                                   | 0.020     | 0.087     | 0.108     | 0.093     | 0.112      | 0.107      | 0.083     |
| Observations                                            | 261       | 261       | 261       | 261       | 256        | 256        | 256       |
| Munich                                                  | -0.321*** | -3.981*** | -5.765*** | -5.981*** | -551.9***  | -562.3***  | -0.457*** |
|                                                         | (0.101)   | (0.642)   | (0.840)   | (0.817)   | (107.5)    | (101.4)    | (0.0628)  |
| $R^2$                                                   | 0.025     | 0.093     | 0.121     | 0.125     | 0.097      | 0.099      | 0.111     |
| Observations                                            | 261       | 261       | 261       | 261       | 256        | 256        | 256       |

Robust standard errors in parentheses. Statistical significance levels: \*  $p < 0.1$ , \*\*  $p < 0.05$ , \*\*\*  $p < 0.01$ .

The following 1-day lagged volatility measures are used in the different specifications: daily returns squared (Vol1), 2-weeks rolling window standard deviation (Vol2), GARCH estimated volatility (Vol3), EGARCH estimated volatility (Vol4), realized volatility with intraday average computed every 10 minutes (Vol5), realized volatility with intraday average computed every 5 minutes (Vol6) and option implied volatility index (Vol7).

Table C.14: Italy - Lagged Volatility

| Dependent variable: Online Pornographic Videos Accesses |           |           |           |          |            |            |
|---------------------------------------------------------|-----------|-----------|-----------|----------|------------|------------|
| Independent variable: Lagged Volatility Measures        |           |           |           |          |            |            |
|                                                         | Vol1      | Vol2      | Vol3      | Vol4     | Vol5       | Vol6       |
| Milan                                                   | -0.0788** | -2.590*** | -1.755*** | -1.468*  | -317.1***  | -330.2***  |
|                                                         | (0.0332)  | (0.493)   | (0.637)   | (0.778)  | (107.2)    | (105.7)    |
| $R^2$                                                   | 0.010     | 0.060     | 0.025     | 0.016    | 0.022      | 0.024      |
| Observations                                            | 261       | 261       | 261       | 261      | 257        | 257        |
| Naples                                                  | -0.0991   | -5.226*** | -3.779*** | -2.999*  | -1062.7*** | -1133.6*** |
|                                                         | (0.0722)  | (0.835)   | (1.230)   | (1.533)  | (123.6)    | (127.6)    |
| $R^2$                                                   | 0.012     | 0.187     | 0.087     | 0.050    | 0.187      | 0.215      |
| Observations                                            | 261       | 261       | 261       | 261      | 257        | 257        |
| Rome                                                    | -0.132    | -5.360*** | -4.074*** | -3.443** | -1144.7*** | -1184.7*** |
|                                                         | (0.0896)  | (0.885)   | (1.310)   | (1.719)  | (117.5)    | (117.1)    |
| $R^2$                                                   | 0.024     | 0.223     | 0.115     | 0.076    | 0.244      | 0.264      |
| Observations                                            | 261       | 261       | 261       | 261      | 257        | 257        |
| Turin                                                   | -0.198    | -8.468*** | -6.165*** | -5.118** | -1616.4*** | -1700.1*** |
|                                                         | (0.126)   | (1.079)   | (1.770)   | (2.381)  | (175.2)    | (181.8)    |
| $R^2$                                                   | 0.022     | 0.230     | 0.109     | 0.069    | 0.202      | 0.226      |
| Observations                                            | 261       | 261       | 261       | 261      | 257        | 257        |

Robust standard errors in parentheses. Statistical significance levels: \*  $p < 0.1$ , \*\*  $p < 0.05$ , \*\*\*  $p < 0.01$ .

The following 1-day lagged volatility measures are used in the different specifications: daily returns squared (Vol1), 2-weeks rolling window standard deviation (Vol2), GARCH estimated volatility (Vol3), EGARCH estimated volatility (Vol4), realized volatility with intraday average computed every 10 minutes (Vol5) and realized volatility with intraday average computed every 5 minutes (Vol6).

Table C.15: Japan - Lagged Volatility

| Dependent variable: Online Pornographic Videos Accesses |                     |                     |                     |                     |                     |                     |                     |
|---------------------------------------------------------|---------------------|---------------------|---------------------|---------------------|---------------------|---------------------|---------------------|
| Independent variable: Lagged Volatility Measures        |                     |                     |                     |                     |                     |                     |                     |
|                                                         | Vol1                | Vol2                | Vol3                | Vol4                | Vol5                | Vol6                | Vol7                |
| Nagoya                                                  | 0.320***<br>(0.116) | 4.518***<br>(0.797) | 5.470***<br>(1.038) | 4.440***<br>(1.124) | 498.8***<br>(118.7) | 618.2***<br>(143.0) | 0.474***<br>(0.114) |
| $R^2$                                                   | 0.045               | 0.114               | 0.119               | 0.065               | 0.115               | 0.125               | 0.072               |
| Observations                                            | 261                 | 261                 | 261                 | 261                 | 243                 | 243                 | 244                 |
| Osaka                                                   | 0.141*<br>(0.0849)  | 1.493**<br>(0.720)  | 1.888**<br>(0.925)  | 1.100<br>(0.985)    | 136.4<br>(86.47)    | 151.6<br>(102.7)    | -0.00525<br>(0.117) |
| $R^2$                                                   | 0.010               | 0.014               | 0.016               | 0.005               | 0.010               | 0.009               | 0.000               |
| Observations                                            | 261                 | 261                 | 261                 | 261                 | 243                 | 243                 | 244                 |
| Tokyo                                                   | 0.137<br>(0.0896)   | -0.0112<br>(0.866)  | 0.101<br>(1.075)    | -2.163*<br>(1.132)  | 115.7<br>(93.64)    | 121.9<br>(112.1)    | -0.278**<br>(0.139) |
| $R^2$                                                   | 0.008               | 0.000               | 0.000               | 0.014               | 0.006               | 0.005               | 0.024               |
| Observations                                            | 261                 | 261                 | 261                 | 261                 | 243                 | 243                 | 244                 |
| Yokohama                                                | 0.376***<br>(0.134) | 6.868***<br>(0.959) | 7.982***<br>(1.233) | 11.07***<br>(1.313) | 615.3***<br>(157.5) | 766.6***<br>(191.9) | 0.985***<br>(0.125) |
| $R^2$                                                   | 0.042               | 0.180               | 0.174               | 0.275               | 0.120               | 0.132               | 0.214               |
| Observations                                            | 261                 | 261                 | 261                 | 261                 | 243                 | 243                 | 244                 |

Robust standard errors in parentheses. Statistical significance levels: \*  $p < 0.1$ , \*\*  $p < 0.05$ , \*\*\*  $p < 0.01$ .

The following 1-day lagged volatility measures are used in the different specifications: daily returns squared (Vol1), 2-weeks rolling window standard deviation (Vol2), GARCH estimated volatility (Vol3), EGARCH estimated volatility (Vol4), realised volatility with intraday average computed every 10 minutes (Vol5), realised volatility with intraday average computed every 5 minutes (Vol6) and option implied volatility index (Vol7).

Table C.16: Singapore - Lagged Volatility

| Dependent variable: Online Pornographic Videos Accesses |                    |                     |                     |                     |                     |                     |
|---------------------------------------------------------|--------------------|---------------------|---------------------|---------------------|---------------------|---------------------|
| Independent variable: Lagged Volatility Measures        |                    |                     |                     |                     |                     |                     |
|                                                         | Vol1               | Vol2                | Vol3                | Vol4                | Vol5                | Vol6                |
| Singapore                                               | 0.653**<br>(0.293) | 5.050***<br>(1.229) | 7.647***<br>(1.727) | 7.663***<br>(1.538) | 646.1***<br>(218.7) | 772.2***<br>(247.6) |
| $R^2$                                                   | 0.013              | 0.052               | 0.068               | 0.077               | 0.031               | 0.033               |
| Observations                                            | 261                | 261                 | 261                 | 261                 | 252                 | 252                 |

Robust standard errors in parentheses. Statistical significance levels: \*  $p < 0.1$ , \*\*  $p < 0.05$ , \*\*\*  $p < 0.01$ .  
The following 1-day lagged volatility measures are used in the different specifications: daily returns squared (Vol1), 2-weeks rolling window standard deviation (Vol2), GARCH estimated volatility (Vol3), EGARCH estimated volatility (Vol4), realised volatility with intraday average computed every 10 minutes (Vol5) and realised volatility with intraday average computed every 5 minutes (Vol6).

Table C.17: Switzerland - Lagged Volatility

| Dependent variable: Online Pornographic Videos Accesses |                      |                      |                      |                      |                      |                      |                       |
|---------------------------------------------------------|----------------------|----------------------|----------------------|----------------------|----------------------|----------------------|-----------------------|
| Independent variable: Lagged Volatility Measures        |                      |                      |                      |                      |                      |                      |                       |
|                                                         | Vol1                 | Vol2                 | Vol3                 | Vol4                 | Vol5                 | Vol6                 | Vol7                  |
| Bern                                                    | -0.770*<br>(0.427)   | -6.331***<br>(1.502) | -9.666***<br>(1.990) | -6.531***<br>(2.072) | -584.5**<br>(277.0)  | -706.9***<br>(270.6) | -0.255*<br>(0.147)    |
| $R^2$                                                   | 0.014                | 0.062                | 0.066                | 0.031                | 0.029                | 0.036                | 0.011                 |
| Observations                                            | 261                  | 261                  | 261                  | 261                  | 254                  | 254                  | 254                   |
| Zurich                                                  | -0.860***<br>(0.218) | -7.695***<br>(0.735) | -11.90***<br>(1.108) | -9.274***<br>(1.194) | -812.4***<br>(184.9) | -989.3***<br>(182.4) | -0.586***<br>(0.0848) |
| $R^2$                                                   | 0.037                | 0.196                | 0.214                | 0.135                | 0.121                | 0.155                | 0.133                 |
| Observations                                            | 261                  | 261                  | 261                  | 261                  | 254                  | 254                  | 254                   |

Robust standard errors in parentheses. Statistical significance levels: \*  $p < 0.1$ , \*\*  $p < 0.05$ , \*\*\*  $p < 0.01$ .  
The following 1-day lagged volatility measures are used in the different specifications: daily returns squared (Vol1), 2-weeks rolling window standard deviation (Vol2), GARCH estimated volatility (Vol3), EGARCH estimated volatility (Vol4), realised volatility with intraday average computed every 10 minutes (Vol5), realised volatility with intraday average computed every 5 minutes (Vol6) and option implied volatility index (Vol7).



Table C.18: United Kingdom - Lagged Volatility

| Dependent variable: Online Pornographic Videos Accesses |                       |                      |                      |                      |                      |                     |                       |
|---------------------------------------------------------|-----------------------|----------------------|----------------------|----------------------|----------------------|---------------------|-----------------------|
| Independent variable: Lagged Volatility Measures        |                       |                      |                      |                      |                      |                     |                       |
|                                                         | Vol1                  | Vol2                 | Vol3                 | Vol4                 | Vol5                 | Vol6                | Vol7                  |
| Birmingham                                              | -0.0311<br>(0.159)    | 1.210*<br>(0.628)    | 1.197<br>(0.828)     | 3.233***<br>(1.196)  | 50.31<br>(56.82)     | 76.25<br>(73.37)    | 0.170**<br>(0.0714)   |
| $R^2$                                                   | 0.000                 | 0.011                | 0.006                | 0.031                | 0.004                | 0.006               | 0.023                 |
| Observations                                            | 261                   | 261                  | 261                  | 261                  | 253                  | 253                 | 258                   |
| Glasgow                                                 | -0.394*<br>(0.222)    | -4.493***<br>(0.719) | -5.137***<br>(0.950) | -5.679***<br>(1.140) | -13.58<br>(87.05)    | -46.97<br>(115.6)   | -0.204**<br>(0.0834)  |
| $R^2$                                                   | 0.013                 | 0.109                | 0.079                | 0.069                | 0.000                | 0.002               | 0.024                 |
| Observations                                            | 261                   | 261                  | 261                  | 261                  | 253                  | 253                 | 258                   |
| Leeds                                                   | -1.004***<br>(0.170)  | -8.165***<br>(0.816) | -10.32***<br>(1.081) | -11.46***<br>(1.154) | -268.5**<br>(128.1)  | -371.2**<br>(159.5) | -0.706***<br>(0.0735) |
| $R^2$                                                   | 0.042                 | 0.181                | 0.162                | 0.142                | 0.042                | 0.056               | 0.142                 |
| Observations                                            | 261                   | 261                  | 261                  | 261                  | 253                  | 253                 | 258                   |
| London                                                  | -0.469***<br>(0.0977) | -2.383***<br>(0.479) | -3.021***<br>(0.629) | -2.629***<br>(0.881) | -78.50***<br>(28.28) | -88.37**<br>(36.01) | -0.176***<br>(0.0494) |
| $R^2$                                                   | 0.033                 | 0.056                | 0.050                | 0.027                | 0.013                | 0.011               | 0.032                 |
| Observations                                            | 261                   | 261                  | 261                  | 261                  | 253                  | 253                 | 258                   |
| Sheffield                                               | -0.135<br>(0.158)     | -1.279<br>(0.834)    | -1.234<br>(1.024)    | -0.315<br>(1.406)    | -13.36<br>(38.02)    | -10.59<br>(51.24)   | 0.0728<br>(0.0788)    |
| $R^2$                                                   | 0.001                 | 0.007                | 0.004                | 0.000                | 0.000                | 0.000               | 0.003                 |
| Observations                                            | 261                   | 261                  | 261                  | 261                  | 253                  | 253                 | 258                   |

Robust standard errors in parentheses. Statistical significance levels: \*  $p < 0.1$ , \*\*  $p < 0.05$ , \*\*\*  $p < 0.01$ .

The following 1-day lagged volatility measures are used in the different specifications: daily returns squared (Vol1), 2-weeks rolling window standard deviation (Vol2), GARCH estimated volatility (Vol3), EGARCH estimated volatility (Vol4), realised volatility with intraday average computed every 10 minutes (Vol5), realised volatility with intraday average computed every 5 minutes (Vol6) and option implied volatility index (Vol7).

Table C.19: United States - Lagged Volatility

| Dependent variable: Online Pornographic Videos Accesses |                                                  |                      |                      |                     |                       |                       |                       |
|---------------------------------------------------------|--------------------------------------------------|----------------------|----------------------|---------------------|-----------------------|-----------------------|-----------------------|
| Independent variable: Lagged Volatility Measures        | Independent variable: Lagged Volatility Measures |                      |                      |                     |                       |                       |                       |
|                                                         | Vol1                                             | Vol2                 | Vol3                 | Vol4                | Vol5                  | Vol6                  | Vol7                  |
| Chicago                                                 | -0.112<br>(0.394)                                | 0.838<br>(2.253)     | -0.825<br>(5.252)    | -2.322<br>(6.371)   | -1660.6***<br>(295.5) | -1704.9***<br>(303.7) | -1.387***<br>(0.215)  |
| $R^2$                                                   | 0.000                                            | 0.001                | 0.000                | 0.001               | 0.131                 | 0.138                 | 0.115                 |
| Observations                                            | 261                                              | 261                  | 261                  | 261                 | 252                   | 252                   | 252                   |
| Dallas                                                  | -0.547<br>(0.526)                                | -4.743*<br>(2.828)   | -9.931<br>(7.144)    | -9.840<br>(8.340)   | -2677.6***<br>(424.5) | -2779.8***<br>(454.3) | -2.511***<br>(0.273)  |
| $R^2$                                                   | 0.006                                            | 0.012                | 0.010                | 0.007               | 0.222                 | 0.240                 | 0.246                 |
| Observations                                            | 261                                              | 261                  | 261                  | 261                 | 252                   | 252                   | 252                   |
| Houston                                                 | 0.385<br>(0.391)                                 | 6.530**<br>(2.662)   | 9.411<br>(6.166)     | 11.35<br>(7.044)    | 2276.3***<br>(444.6)  | 2330.4***<br>(480.9)  | 2.364***<br>(0.245)   |
| $R^2$                                                   | 0.003                                            | 0.024                | 0.009                | 0.010               | 0.171                 | 0.180                 | 0.233                 |
| Observations                                            | 261                                              | 261                  | 261                  | 261                 | 252                   | 252                   | 252                   |
| Los Angeles                                             | -0.392*<br>(0.209)                               | -2.925***<br>(1.123) | -5.554***<br>(2.438) | -3.880<br>(2.914)   | -529.7***<br>(117.7)  | -528.0***<br>(115.1)  | -0.370***<br>(0.124)  |
| $R^2$                                                   | 0.015                                            | 0.021                | 0.014                | 0.005               | 0.039                 | 0.039                 | 0.024                 |
| Observations                                            | 261                                              | 261                  | 261                  | 261                 | 252                   | 252                   | 252                   |
| Miami                                                   | -0.735<br>(0.668)                                | -8.659**<br>(3.453)  | -13.09<br>(9.148)    | -11.37<br>(11.04)   | -2619.2***<br>(380.1) | -2749.7***<br>(392.5) | -2.311***<br>(0.323)  |
| $R^2$                                                   | 0.006                                            | 0.023                | 0.009                | 0.005               | 0.119                 | 0.131                 | 0.117                 |
| Observations                                            | 261                                              | 261                  | 261                  | 261                 | 252                   | 252                   | 252                   |
| New York                                                | -0.809*<br>(0.458)                               | -10.36***<br>(2.095) | -14.38**<br>(6.182)  | -11.60*<br>(6.426)  | -1124.6***<br>(224.9) | -1144.8***<br>(223.4) | -1.099***<br>(0.202)  |
| $R^2$                                                   | 0.013                                            | 0.056                | 0.019                | 0.009               | 0.038                 | 0.039                 | 0.046                 |
| Observations                                            | 261                                              | 261                  | 261                  | 261                 | 252                   | 252                   | 252                   |
| Philadelphia                                            | -0.520<br>(0.444)                                | -5.950**<br>(2.559)  | -7.778<br>(6.239)    | -9.014<br>(7.219)   | -2263.5***<br>(397.4) | -2335.0***<br>(426.8) | -2.098***<br>(0.252)  |
| $R^2$                                                   | 0.007                                            | 0.024                | 0.007                | 0.007               | 0.200                 | 0.214                 | 0.217                 |
| Observations                                            | 261                                              | 261                  | 261                  | 261                 | 252                   | 252                   | 252                   |
| Phoenix                                                 | -0.106<br>(0.160)                                | -2.191***<br>(0.714) | -3.363*<br>(2.013)   | -3.137<br>(2.535)   | -264.9***<br>(85.55)  | -282.3***<br>(82.89)  | -0.263***<br>(0.0818) |
| $R^2$                                                   | 0.003                                            | 0.033                | 0.014                | 0.009               | 0.028                 | 0.032                 | 0.035                 |
| Observations                                            | 261                                              | 261                  | 261                  | 261                 | 252                   | 252                   | 252                   |
| San Antonio                                             | -1.238*<br>(0.727)                               | -20.77***<br>(3.655) | -23.40**<br>(9.800)  | -24.42**<br>(11.63) | -3186.5***<br>(721.7) | -3311.0***<br>(774.5) | -3.390***<br>(0.465)  |
| $R^2$                                                   | 0.011                                            | 0.082                | 0.019                | 0.015               | 0.110                 | 0.120                 | 0.158                 |
| Observations                                            | 261                                              | 261                  | 261                  | 261                 | 252                   | 252                   | 252                   |
| San Diego                                               | 0.276<br>(0.214)                                 | 1.714<br>(1.416)     | 3.551<br>(3.222)     | 1.596<br>(4.184)    | 405.8**<br>(157.5)    | 394.7**<br>(157.7)    | 0.612***<br>(0.157)   |
| $R^2$                                                   | 0.004                                            | 0.004                | 0.003                | 0.000               | 0.014                 | 0.013                 | 0.040                 |
| Observations                                            | 261                                              | 261                  | 261                  | 261                 | 252                   | 252                   | 252                   |
| San Francisco                                           | -0.316<br>(0.318)                                | -3.482*<br>(1.835)   | -6.473<br>(4.568)    | -6.477<br>(5.196)   | -1497.3***<br>(277.9) | -1526.0***<br>(296.0) | -1.403***<br>(0.238)  |
| $R^2$                                                   | 0.005                                            | 0.016                | 0.010                | 0.007               | 0.167                 | 0.174                 | 0.185                 |
| Observations                                            | 261                                              | 261                  | 261                  | 261                 | 252                   | 252                   | 252                   |
| Washington                                              | -0.361<br>(0.407)                                | -0.592<br>(2.131)    | -2.625<br>(4.779)    | -0.0152<br>(5.259)  | -1293.8***<br>(218.5) | -1332.2***<br>(208.8) | -1.255***<br>(0.205)  |
| $R^2$                                                   | 0.005                                            | 0.000                | 0.001                | 0.000               | 0.091                 | 0.097                 | 0.108                 |
| Observations                                            | 261                                              | 261                  | 261                  | 261                 | 252                   | 252                   | 252                   |

Robust standard errors in parentheses. Statistical significance levels: \*  $p < 0.1$ , \*\*  $p < 0.05$ , \*\*\*  $p < 0.01$ . The following 1-day lagged volatility measures are used in the different specifications: daily returns squared (Vol1), 2-weeks rolling window standard deviation (Vol2), GARCH estimated volatility (Vol3), EGARCH estimated volatility (Vol4), realised volatility with intraday average computed every 10 minutes (Vol5), realised volatility with intraday average computed every 5 minutes (Vol6) and option implied volatility index (Vol7).

## C.8 US Volatility

Table C.20: China - US Volatility

| Dependent variable: Online Pornographic Videos Accesses |                                           |                      |                     |                    |                       |                       |                      |
|---------------------------------------------------------|-------------------------------------------|----------------------|---------------------|--------------------|-----------------------|-----------------------|----------------------|
|                                                         | Independent variable: Volatility Measures |                      |                     |                    |                       |                       |                      |
|                                                         | Vol1                                      | Vol2                 | Vol3                | Vol4               | Vol5                  | Vol6                  | Vol7                 |
| Beijing                                                 | -0.905<br>(1.192)                         | 2.322<br>(9.584)     | -1.204<br>(19.68)   | 4.693<br>(24.10)   | 4151.3***<br>(1269.9) | 4276.9***<br>(1324.5) | 3.320***<br>(0.905)  |
| $R^2$                                                   | 0.001                                     | 0.000                | 0.000               | 0.000              | 0.040                 | 0.043                 | 0.033                |
| Observations                                            | 260                                       | 260                  | 260                 | 260                | 251                   | 251                   | 251                  |
| Guangzhou                                               | 0.162<br>(0.892)                          | 17.75***<br>(5.836)  | 17.39<br>(14.88)    | 23.73<br>(18.20)   | 2647.7***<br>(860.3)  | 2765.4***<br>(902.7)  | 1.697**<br>(0.738)   |
| $R^2$                                                   | 0.000                                     | 0.028                | 0.005               | 0.007              | 0.036                 | 0.039                 | 0.019                |
| Observations                                            | 260                                       | 260                  | 260                 | 260                | 251                   | 251                   | 251                  |
| Hong Kong                                               | -0.306<br>(0.206)                         | -4.297***<br>(1.139) | -5.866**<br>(2.775) | -6.906*<br>(3.570) | 94.88<br>(187.6)      | 100.7<br>(182.5)      | 0.251*<br>(0.150)    |
| $R^2$                                                   | 0.009                                     | 0.046                | 0.015               | 0.016              | 0.001                 | 0.001                 | 0.011                |
| Observations                                            | 260                                       | 260                  | 260                 | 260                | 251                   | 251                   | 251                  |
| Shanghai                                                | -0.368<br>(0.694)                         | 1.493<br>(3.817)     | -3.935<br>(10.26)   | 1.309<br>(11.81)   | -936.4**<br>(432.9)   | -958.6**<br>(425.6)   | -1.221***<br>(0.396) |
| $R^2$                                                   | 0.001                                     | 0.000                | 0.001               | 0.000              | 0.009                 | 0.010                 | 0.020                |
| Observations                                            | 260                                       | 260                  | 260                 | 260                | 251                   | 251                   | 251                  |
| Shenzhen                                                | -1.224<br>(0.833)                         | -3.990<br>(5.301)    | -11.32<br>(12.08)   | -10.54<br>(13.79)  | 278.0<br>(564.8)      | 332.4<br>(553.5)      | -0.251<br>(0.478)    |
| $R^2$                                                   | 0.008                                     | 0.002                | 0.003               | 0.002              | 0.001                 | 0.001                 | 0.001                |
| Observations                                            | 260                                       | 260                  | 260                 | 260                | 251                   | 251                   | 251                  |
| Tianjin                                                 | -1.268<br>(1.538)                         | -2.783<br>(12.04)    | -9.918<br>(24.06)   | -0.394<br>(29.42)  | 6187.1***<br>(1740.9) | 6294.7***<br>(1817.2) | 5.469***<br>(1.125)  |
| $R^2$                                                   | 0.002                                     | 0.000                | 0.000               | 0.000              | 0.054                 | 0.056                 | 0.053                |
| Observations                                            | 260                                       | 260                  | 260                 | 260                | 251                   | 251                   | 251                  |

Robust standard errors in parentheses. Statistical significance levels: \*  $p < 0.1$ , \*\*  $p < 0.05$ , \*\*\*  $p < 0.01$ .

The following US volatility measures are used in the different specifications: daily returns squared (Vol1), 2-weeks rolling window standard deviation (Vol2), GARCH estimated volatility (Vol3), EGARCH estimated volatility (Vol4), realized volatility with intraday average computed every 10 minutes (Vol5), realized volatility with intraday average computed every 5 minutes (Vol6) and option implied volatility index (Vol7).

Table C.21: France - US Volatility

| Dependent variable: Online Pornographic Videos Accesses |                    |                      |                     |                    |                       |                       |                      |
|---------------------------------------------------------|--------------------|----------------------|---------------------|--------------------|-----------------------|-----------------------|----------------------|
| Independent variable: Volatility Measures               |                    |                      |                     |                    |                       |                       |                      |
|                                                         | Vol1               | Vol2                 | Vol3                | Vol4               | Vol5                  | Vol6                  | Vol7                 |
| Lyon                                                    | 0.121<br>(0.245)   | 0.559<br>(1.432)     | 1.591<br>(3.163)    | 1.767<br>(4.147)   | 622.7***<br>(188.9)   | 568.2***<br>(191.8)   | 0.858***<br>(0.158)  |
| $R^2$                                                   | 0.001              | 0.000                | 0.001               | 0.001              | 0.027                 | 0.023                 | 0.065                |
| Observations                                            | 260                | 260                  | 260                 | 260                | 251                   | 251                   | 251                  |
| Marseille                                               | -0.374<br>(0.276)  | -3.525*<br>(1.837)   | -6.720<br>(4.248)   | -7.692<br>(4.781)  | -67.11<br>(260.2)     | -107.2<br>(257.2)     | 0.218<br>(0.252)     |
| $R^2$                                                   | 0.007              | 0.017                | 0.011               | 0.011              | 0.000                 | 0.001                 | 0.005                |
| Observations                                            | 260                | 260                  | 260                 | 260                | 251                   | 251                   | 251                  |
| Nice                                                    | -0.243<br>(0.236)  | -2.950**<br>(1.286)  | -4.443<br>(3.468)   | -7.657*<br>(4.099) | 37.74<br>(182.9)      | 28.30<br>(177.1)      | 0.320*<br>(0.174)    |
| $R^2$                                                   | 0.004              | 0.016                | 0.007               | 0.014              | 0.000                 | 0.000                 | 0.013                |
| Observations                                            | 260                | 260                  | 260                 | 260                | 251                   | 251                   | 251                  |
| Paris                                                   | -0.651*<br>(0.363) | -5.671***<br>(1.888) | -11.75**<br>(4.704) | -10.11*<br>(5.518) | -1653.3***<br>(223.0) | -1707.2***<br>(233.0) | -1.696***<br>(0.194) |
| $R^2$                                                   | 0.019              | 0.036                | 0.028               | 0.015              | 0.173                 | 0.185                 | 0.231                |
| Observations                                            | 260                | 260                  | 260                 | 260                | 251                   | 251                   | 251                  |
| Toulouse                                                | -0.128<br>(0.299)  | -2.369<br>(1.820)    | -2.228<br>(4.660)   | -4.987<br>(5.517)  | 1289.8***<br>(248.0)  | 1283.5***<br>(253.4)  | 1.381***<br>(0.181)  |
| $R^2$                                                   | 0.001              | 0.005                | 0.001               | 0.003              | 0.079                 | 0.079                 | 0.115                |
| Observations                                            | 260                | 260                  | 260                 | 260                | 251                   | 251                   | 251                  |

Robust standard errors in parentheses. Statistical significance levels: \*  $p < 0.1$ , \*\*  $p < 0.05$ , \*\*\*  $p < 0.01$ .

The following US volatility measures are used in the different specifications: daily returns squared (Vol1), 2-weeks rolling window standard deviation (Vol2), GARCH estimated volatility (Vol3), EGARCH estimated volatility (Vol4), realised volatility with intraday average computed every 10 minutes (Vol5), realised volatility with intraday average computed every 5 minutes (Vol6) and option implied volatility index (Vol7).

Table C.22: Germany - US Volatility

| Dependent variable: Online Pornographic Videos Accesses |                                           |                  |                   |                   |                       |                       |                       |
|---------------------------------------------------------|-------------------------------------------|------------------|-------------------|-------------------|-----------------------|-----------------------|-----------------------|
|                                                         | Independent variable: Volatility Measures |                  |                   |                   |                       |                       |                       |
|                                                         | Vol1                                      | Vol2             | Vol3              | Vol4              | Vol5                  | Vol6                  | Vol7                  |
| Berlin                                                  | 0.0622<br>(0.185)                         | 1.395<br>(1.048) | 1.192<br>(2.186)  | 1.934<br>(2.610)  | -52.38<br>(122.4)     | -53.23<br>(122.1)     | 0.0637<br>(0.123)     |
| $R^2$                                                   | 0.000                                     | 0.006            | 0.001             | 0.002             | 0.001                 | 0.001                 | 0.001                 |
| Observations                                            | 260                                       | 260              | 260               | 260               | 251                   | 251                   | 251                   |
| Frankfurt                                               | -0.564<br>(1.000)                         | 1.062<br>(5.901) | -7.664<br>(14.90) | -0.869<br>(17.71) | -4860.0***<br>(747.6) | -4966.0***<br>(770.9) | -5.140***<br>(0.595)  |
| $R^2$                                                   | 0.001                                     | 0.000            | 0.001             | 0.000             | 0.127                 | 0.132                 | 0.179                 |
| Observations                                            | 260                                       | 260              | 260               | 260               | 251                   | 251                   | 251                   |
| Hamburg                                                 | -0.164<br>(0.233)                         | 0.223<br>(1.338) | -2.338<br>(2.829) | -4.960<br>(3.782) | -539.7***<br>(139.2)  | -552.2***<br>(129.3)  | -0.307*<br>(0.164)    |
| $R^2$                                                   | 0.002                                     | 0.000            | 0.002             | 0.007             | 0.035                 | 0.036                 | 0.014                 |
| Observations                                            | 260                                       | 260              | 260               | 260               | 251                   | 251                   | 251                   |
| Munich                                                  | -0.0640<br>(0.179)                        | 1.227<br>(0.999) | -2.469<br>(1.996) | -2.062<br>(2.427) | -477.4***<br>(99.48)  | -488.7***<br>(93.05)  | -0.373***<br>(0.1000) |
| $R^2$                                                   | 0.001                                     | 0.006            | 0.004             | 0.002             | 0.050                 | 0.052                 | 0.038                 |
| Observations                                            | 260                                       | 260              | 260               | 260               | 251                   | 251                   | 251                   |

Robust standard errors in parentheses. Statistical significance levels: \*  $p < 0.1$ , \*\*  $p < 0.05$ , \*\*\*  $p < 0.01$ .

The following US volatility measures are used in the different specifications: daily returns squared (Vol1), 2-weeks rolling window standard deviation (Vol2), GARCH estimated volatility (Vol3), EGARCH estimated volatility (Vol4), realised volatility with intraday average computed every 10 minutes (Vol5), realised volatility with intraday average computed every 5 minutes (Vol6) and option implied volatility index (Vol7).

Table C.23: Italy - US Volatility

| Dependent variable: Online Pornographic Videos Accesses |                   |                      |                     |                     |                       |                       |                      |
|---------------------------------------------------------|-------------------|----------------------|---------------------|---------------------|-----------------------|-----------------------|----------------------|
| Independent variable: Volatility Measures               |                   |                      |                     |                     |                       |                       |                      |
|                                                         | Vol1              | Vol2                 | Vol3                | Vol4                | Vol5                  | Vol6                  | Vol7                 |
| Milan                                                   | -0.199<br>(0.261) | 1.481<br>(1.427)     | -3.259<br>(3.234)   | -1.957<br>(4.059)   | -450.2***<br>(161.7)  | -495.3***<br>(161.6)  | -0.262<br>(0.181)    |
| $R^2$                                                   | 0.003             | 0.004                | 0.003               | 0.001               | 0.020                 | 0.024                 | 0.008                |
| Observations                                            | 260               | 260                  | 260                 | 260                 | 251                   | 251                   | 251                  |
| Naples                                                  | -0.181<br>(0.418) | -1.994<br>(1.685)    | -5.616<br>(4.388)   | -4.201<br>(5.375)   | -1154.7***<br>(204.5) | -1199.4***<br>(214.8) | -0.912***<br>(0.205) |
| $R^2$                                                   | 0.002             | 0.005                | 0.008               | 0.003               | 0.099                 | 0.107                 | 0.078                |
| Observations                                            | 260               | 260                  | 260                 | 260                 | 251                   | 251                   | 251                  |
| Rome                                                    | -0.455<br>(0.360) | -4.448***<br>(1.604) | -10.89**<br>(4.269) | -12.24**<br>(5.330) | -1445.4***<br>(236.1) | -1513.2***<br>(252.7) | -1.289***<br>(0.195) |
| $R^2$                                                   | 0.012             | 0.030                | 0.032               | 0.030               | 0.174                 | 0.191                 | 0.176                |
| Observations                                            | 260               | 260                  | 260                 | 260                 | 251                   | 251                   | 251                  |
| Turin                                                   | -0.239<br>(0.523) | 0.321<br>(2.634)     | -4.340<br>(6.939)   | -0.544<br>(8.275)   | -1752.0***<br>(306.9) | -1794.1***<br>(311.1) | -1.551***<br>(0.278) |
| $R^2$                                                   | 0.001             | 0.000                | 0.002               | 0.000               | 0.104                 | 0.109                 | 0.104                |
| Observations                                            | 260               | 260                  | 260                 | 260                 | 251                   | 251                   | 251                  |

Robust standard errors in parentheses. Statistical significance levels: \*  $p < 0.1$ , \*\*  $p < 0.05$ , \*\*\*  $p < 0.01$ .

The following US volatility measures are used in the different specifications: daily returns squared (Vol1), 2-weeks rolling window standard deviation (Vol2), GARCH estimated volatility (Vol3), EGARCH estimated volatility (Vol4), realised volatility with intraday average computed every 10 minutes (Vol5), realised volatility with intraday average computed every 5 minutes (Vol6) and option implied volatility index (Vol7).

Table C.24: Japan - US Volatility

| Dependent variable: Online Pornographic Videos Accesses |         |          |         |         |           |           |          |
|---------------------------------------------------------|---------|----------|---------|---------|-----------|-----------|----------|
| Independent variable: Volatility Measures               |         |          |         |         |           |           |          |
|                                                         | Vol1    | Vol2     | Vol3    | Vol4    | Vol5      | Vol6      | Vol7     |
| Nagoya                                                  | 0.197   | 3.929**  | 5.144   | 6.612   | 903.1***  | 949.8***  | 0.874*** |
|                                                         | (0.249) | (1.605)  | (3.865) | (4.281) | (236.1)   | (251.5)   | (0.157)  |
| $R^2$                                                   | 0.003   | 0.029    | 0.009   | 0.011   | 0.086     | 0.095     | 0.102    |
| Observations                                            | 260     | 260      | 260     | 260     | 251       | 251       | 251      |
| Osaka                                                   | 0.224   | 5.032*** | 7.049*  | 9.667** | 517.9**   | 578.6**   | 0.494*** |
|                                                         | (0.231) | (1.535)  | (3.964) | (4.217) | (212.8)   | (224.8)   | (0.162)  |
| $R^2$                                                   | 0.004   | 0.047    | 0.017   | 0.023   | 0.028     | 0.035     | 0.032    |
| Observations                                            | 260     | 260      | 260     | 260     | 251       | 251       | 251      |
| Tokyo                                                   | 0.120   | 5.237*** | 6.434   | 8.886*  | 102.0     | 132.0     | 0.149    |
|                                                         | (0.255) | (1.569)  | (4.555) | (5.068) | (201.2)   | (197.4)   | (0.179)  |
| $R^2$                                                   | 0.001   | 0.044    | 0.012   | 0.017   | 0.001     | 0.002     | 0.003    |
| Observations                                            | 260     | 260      | 260     | 260     | 251       | 251       | 251      |
| Yokohama                                                | 0.127   | 2.976*   | 6.135   | 6.765   | 1521.1*** | 1599.6*** | 1.492*** |
|                                                         | (0.293) | (1.769)  | (4.924) | (5.301) | (331.3)   | (362.3)   | (0.200)  |
| $R^2$                                                   | 0.001   | 0.011    | 0.008   | 0.007   | 0.162     | 0.180     | 0.198    |
| Observations                                            | 260     | 260      | 260     | 260     | 251       | 251       | 251      |

Robust standard errors in parentheses. Statistical significance levels: \*  $p < 0.1$ , \*\*  $p < 0.05$ , \*\*\*  $p < 0.01$ .

The following US volatility measures are used in the different specifications: daily returns squared (Vol1), 2-weeks rolling window standard deviation (Vol2), GARCH estimated volatility (Vol3), EGARCH estimated volatility (Vol4), realised volatility with intraday average computed every 10 minutes (Vol5), realised volatility with intraday average computed every 5 minutes (Vol6) and option implied volatility index (Vol7).

Table C.25: Singapore - US Volatility

| Dependent variable: Online Pornographic Videos Accesses |                    |                     |                  |                   |                     |                     |                      |
|---------------------------------------------------------|--------------------|---------------------|------------------|-------------------|---------------------|---------------------|----------------------|
| Independent variable: Volatility Measures               |                    |                     |                  |                   |                     |                     |                      |
|                                                         | Vol1               | Vol2                | Vol3             | Vol4              | Vol5                | Vol6                | Vol7                 |
| Singapore                                               | -0.0735<br>(0.188) | 2.454***<br>(0.755) | 0.437<br>(2.562) | 0.0374<br>(3.215) | 322.2***<br>(104.4) | 325.8***<br>(102.2) | 0.406***<br>(0.0707) |
| $R^2$                                                   | 0.001              | 0.040               | 0.000            | 0.000             | 0.041               | 0.042               | 0.083                |
| Observations                                            | 260                | 260                 | 260              | 260               | 251                 | 251                 | 251                  |

Robust standard errors in parentheses. Statistical significance levels: \*  $p < 0.1$ , \*\*  $p < 0.05$ , \*\*\*  $p < 0.01$ .

The following US volatility measures are used in the different specifications: daily returns squared (Vol1), 2-weeks rolling window standard deviation (Vol2), GARCH estimated volatility (Vol3), EGARCH estimated volatility (Vol4), realized volatility with intraday average computed every 10 minutes (Vol5), realized volatility with intraday average computed every 5 minutes (Vol6) and option implied volatility index (Vol7).

Table C.26: Switzerland - US Volatility

| Dependent variable: Online Pornographic Videos Accesses |                    |                   |                     |                   |                      |                      |                      |
|---------------------------------------------------------|--------------------|-------------------|---------------------|-------------------|----------------------|----------------------|----------------------|
| Independent variable: Volatility Measures               |                    |                   |                     |                   |                      |                      |                      |
|                                                         | Vol1               | Vol2              | Vol3                | Vol4              | Vol5                 | Vol6                 | Vol7                 |
| Bern                                                    | -0.0769<br>(0.287) | 0.579<br>(1.688)  | -2.824<br>(3.697)   | -0.545<br>(4.352) | -677.9***<br>(189.8) | -722.8***<br>(189.7) | -0.326*<br>(0.193)   |
| $R^2$                                                   | 0.000              | 0.001             | 0.002               | 0.000             | 0.043                | 0.049                | 0.013                |
| Observations                                            | 260                | 260               | 260                 | 260               | 251                  | 251                  | 251                  |
| Zurich                                                  | -0.244<br>(0.189)  | -1.688<br>(1.046) | -4.653**<br>(2.338) | -3.895<br>(2.833) | -701.5***<br>(104.1) | -714.4***<br>(106.1) | -0.585***<br>(0.108) |
| $R^2$                                                   | 0.008              | 0.010             | 0.013               | 0.007             | 0.093                | 0.096                | 0.082                |
| Observations                                            | 260                | 260               | 260                 | 260               | 251                  | 251                  | 251                  |

Robust standard errors in parentheses. Statistical significance levels: \*  $p < 0.1$ , \*\*  $p < 0.05$ , \*\*\*  $p < 0.01$ .

The following US volatility measures are used in the different specifications: daily returns squared (Vol1), 2-weeks rolling window standard deviation (Vol2), GARCH estimated volatility (Vol3), EGARCH estimated volatility (Vol4), realised volatility with intraday average computed every 10 minutes (Vol5), realised volatility with intraday average computed every 5 minutes (Vol6) and option implied volatility index (Vol7).



Table C.27: United Kingdom - US Volatility

| Dependent variable: Online Pornographic Videos Accesses |                    |                      |                   |                     |                      |                      |                      |
|---------------------------------------------------------|--------------------|----------------------|-------------------|---------------------|----------------------|----------------------|----------------------|
| Independent variable: Volatility Measures               |                    |                      |                   |                     |                      |                      |                      |
|                                                         | Vol1               | Vol2                 | Vol3              | Vol4                | Vol5                 | Vol6                 | Vol7                 |
| Birmingham                                              | -0.122<br>(0.149)  | -0.397<br>(0.805)    | -1.028<br>(2.131) | -0.938<br>(2.552)   | -3.511<br>(127.1)    | -16.29<br>(123.3)    | 0.204*<br>(0.116)    |
| $R^2$                                                   | 0.003              | 0.001                | 0.001             | 0.001               | 0.000                | 0.000                | 0.015                |
| Observations                                            | 260                | 260                  | 260               | 260                 | 251                  | 251                  | 251                  |
| Glasgow                                                 | -0.102<br>(0.186)  | -2.478***<br>(0.901) | -2.672<br>(2.468) | -3.354<br>(3.051)   | -525.5***<br>(141.9) | -569.1***<br>(146.5) | -0.320***<br>(0.120) |
| $R^2$                                                   | 0.002              | 0.025                | 0.005             | 0.006               | 0.063                | 0.074                | 0.030                |
| Observations                                            | 260                | 260                  | 260               | 260                 | 251                  | 251                  | 251                  |
| Leeds                                                   | -0.0501<br>(0.284) | 0.306<br>(1.482)     | -0.938<br>(3.723) | -0.00100<br>(4.479) | -793.0***<br>(118.3) | -844.9***<br>(115.7) | -0.547***<br>(0.147) |
| $R^2$                                                   | 0.000              | 0.000                | 0.000             | 0.000               | 0.071                | 0.081                | 0.043                |
| Observations                                            | 260                | 260                  | 260               | 260                 | 251                  | 251                  | 251                  |
| London                                                  | -0.0432<br>(0.140) | 0.536<br>(0.830)     | -0.552<br>(1.773) | 0.972<br>(2.060)    | -162.5*<br>(97.30)   | -170.2*<br>(95.23)   | -0.133<br>(0.0871)   |
| $R^2$                                                   | 0.001              | 0.002                | 0.000             | 0.001               | 0.011                | 0.012                | 0.009                |
| Observations                                            | 260                | 260                  | 260               | 260                 | 251                  | 251                  | 251                  |
| Sheffield                                               | -0.0157<br>(0.191) | 2.635**<br>(1.099)   | 2.011<br>(2.313)  | 2.648<br>(2.832)    | -131.7<br>(124.6)    | -152.3<br>(121.0)    | 0.139<br>(0.130)     |
| $R^2$                                                   | 0.000              | 0.022                | 0.002             | 0.003               | 0.003                | 0.004                | 0.004                |
| Observations                                            | 260                | 260                  | 260               | 260                 | 251                  | 251                  | 251                  |

Robust standard errors in parentheses. Statistical significance levels: \*  $p < 0.1$ , \*\*  $p < 0.05$ , \*\*\*  $p < 0.01$ .

The following US volatility measures are used in the different specifications: daily returns squared (Vol1), 2-weeks rolling window standard deviation (Vol2), GARCH estimated volatility (Vol3), EGARCH estimated volatility (Vol4), realized volatility with intraday average computed every 10 minutes (Vol5), realized volatility with intraday average computed every 5 minutes (Vol6) and option implied volatility index (Vol7).

## C.9 Global Measures: EPU and Commodity Volatility

Table C.28: China - US global measures

| Dependent variable: Online Pornographic Videos Accesses |                        |                     |                     |
|---------------------------------------------------------|------------------------|---------------------|---------------------|
| Independent variable: Volatility Measures               |                        |                     |                     |
|                                                         | EPU                    | VIX OIL             | VIX GOLD            |
| Beijing                                                 | -0.167***<br>(0.0432)  | 2.468***<br>(0.270) | 9.507***<br>(1.181) |
| $R^2$                                                   | 0.024                  | 0.146               | 0.156               |
| Observations                                            | 366                    | 251                 | 251                 |
| Guangzhou                                               | 0.0555<br>(0.0409)     | 1.230***<br>(0.236) | 4.980***<br>(0.923) |
| $R^2$                                                   | 0.006                  | 0.080               | 0.094               |
| Observations                                            | 366                    | 251                 | 251                 |
| Hong Kong                                               | -0.0395***<br>(0.0107) | 0.0934<br>(0.0573)  | 0.258*<br>(0.140)   |
| $R^2$                                                   | 0.073                  | 0.013               | 0.007               |
| Observations                                            | 366                    | 251                 | 251                 |
| Shanghai                                                | 0.0357<br>(0.0271)     | -0.311*<br>(0.158)  | 1.345**<br>(0.626)  |
| $R^2$                                                   | 0.005                  | 0.011               | 0.014               |
| Observations                                            | 366                    | 251                 | 251                 |
| Shenzhen                                                | -0.0582**<br>(0.0258)  | 0.588***<br>(0.158) | 2.304***<br>(0.707) |
| $R^2$                                                   | 0.009                  | 0.026               | 0.029               |
| Observations                                            | 366                    | 251                 | 251                 |
| Tianjin                                                 | -0.319***<br>(0.0624)  | 3.714***<br>(0.345) | 13.55***<br>(1.418) |
| $R^2$                                                   | 0.053                  | 0.199               | 0.191               |
| Observations                                            | 366                    | 251                 | 251                 |

Robust standard errors in parentheses. Statistical significance levels: \*  $p < 0.1$ , \*\*  $p < 0.05$ , \*\*\*  $p < 0.01$ .

The following US global measures are used in the different specifications: Economic Policy Uncertainty Index (EPU), US oil option implied volatility index (VIX OIL) and US gold option implied volatility index (VIX GOLD).

Table C.29: France - US global measures

| Dependent variable: Online Pornographic Videos Accesses |                        |                       |                      |
|---------------------------------------------------------|------------------------|-----------------------|----------------------|
| Independent variable: Volatility Measures               |                        |                       |                      |
|                                                         | EPU                    | VIX OIL               | VIX GOLD             |
| Lyon                                                    | -0.0205**<br>(0.00931) | 0.214***<br>(0.0478)  | 1.414***<br>(0.243)  |
| $R^2$                                                   | 0.010                  | 0.033                 | 0.104                |
| Observations                                            | 366                    | 251                   | 251                  |
| Marseille                                               | -0.0144<br>(0.0118)    | -0.0384<br>(0.0789)   | 1.190***<br>(0.307)  |
| $R^2$                                                   | 0.006                  | 0.001                 | 0.080                |
| Observations                                            | 366                    | 251                   | 251                  |
| Nice                                                    | -0.0219**<br>(0.0105)  | 0.0844<br>(0.0635)    | 0.504**<br>(0.205)   |
| $R^2$                                                   | 0.017                  | 0.008                 | 0.019                |
| Observations                                            | 366                    | 251                   | 251                  |
| Paris                                                   | 0.0120<br>(0.0140)     | -0.789***<br>(0.0389) | -2.710***<br>(0.208) |
| $R^2$                                                   | 0.003                  | 0.405                 | 0.345                |
| Observations                                            | 366                    | 251                   | 251                  |
| Toulouse                                                | -0.0553***<br>(0.0166) | 0.571***<br>(0.0730)  | 2.046***<br>(0.241)  |
| $R^2$                                                   | 0.053                  | 0.160                 | 0.148                |
| Observations                                            | 366                    | 251                   | 251                  |

Robust standard errors in parentheses. Statistical significance levels: \*  $p < 0.1$ , \*\*  $p < 0.05$ , \*\*\*  $p < 0.01$ .

The following US global measures are used in the different specifications: Economic Policy Uncertainty Index (EPU), US oil option implied volatility index (VIX OIL) and US gold option implied volatility index (VIX GOLD).

Table C.30: Germany - US global measures

| Dependent variable: Online Pornographic Videos Accesses |                       |                       |                      |
|---------------------------------------------------------|-----------------------|-----------------------|----------------------|
| Independent variable: Volatility Measures               |                       |                       |                      |
|                                                         | EPU                   | VIX OIL               | VIX GOLD             |
| Berlin                                                  | 0.0186**<br>(0.00876) | -0.110***<br>(0.0387) | -0.474***<br>(0.152) |
| $R^2$                                                   | 0.021                 | 0.023                 | 0.031                |
| Observations                                            | 366                   | 251                   | 251                  |
| Frankfurt                                               | 0.204***<br>(0.0638)  | -2.439***<br>(0.198)  | -8.010***<br>(0.738) |
| $R^2$                                                   | 0.081                 | 0.328                 | 0.255                |
| Observations                                            | 366                   | 251                   | 251                  |
| Hamburg                                                 | 0.0243**<br>(0.0101)  | -0.266***<br>(0.0413) | -1.363***<br>(0.167) |
| $R^2$                                                   | 0.024                 | 0.087                 | 0.165                |
| Observations                                            | 366                   | 251                   | 251                  |
| Munich                                                  | 0.0159*<br>(0.00878)  | -0.218***<br>(0.0283) | -0.832***<br>(0.135) |
| $R^2$                                                   | 0.018                 | 0.106                 | 0.112                |
| Observations                                            | 366                   | 251                   | 251                  |

Robust standard errors in parentheses. Statistical significance levels: \*  $p < 0.1$ , \*\*  $p < 0.05$ , \*\*\*  $p < 0.01$ .

The following US global measures are used in the different specifications: Economic Policy Uncertainty Index (EPU), US oil option implied volatility index (VIX OIL) and US gold option implied volatility index (VIX GOLD).

Table C.31: Italy - US global measures

| Dependent variable: Online Pornographic Videos Accesses |                       |                       |                      |
|---------------------------------------------------------|-----------------------|-----------------------|----------------------|
| Independent variable: Volatility Measures               |                       |                       |                      |
|                                                         | EPU                   | VIX OIL               | VIX GOLD             |
| Milan                                                   | 0.0120<br>(0.00915)   | -0.262***<br>(0.0391) | 0.217<br>(0.246)     |
| $R^2$                                                   | 0.005                 | 0.068                 | 0.003                |
| Observations                                            | 366                   | 251                   | 251                  |
| Naples                                                  | 0.0187**<br>(0.00911) | -0.634***<br>(0.0378) | -1.858***<br>(0.231) |
| $R^2$                                                   | 0.009                 | 0.307                 | 0.190                |
| Observations                                            | 366                   | 251                   | 251                  |
| Rome                                                    | 0.0198**<br>(0.00963) | -0.703***<br>(0.0381) | -1.809***<br>(0.227) |
| $R^2$                                                   | 0.012                 | 0.423                 | 0.202                |
| Observations                                            | 366                   | 251                   | 251                  |
| Turin                                                   | 0.0503***<br>(0.0185) | -0.879***<br>(0.0589) | -2.373***<br>(0.321) |
| $R^2$                                                   | 0.032                 | 0.270                 | 0.142                |
| Observations                                            | 366                   | 251                   | 251                  |

Robust standard errors in parentheses. Statistical significance levels: \*  $p < 0.1$ , \*\*  $p < 0.05$ , \*\*\*  $p < 0.01$ .

The following US global measures are used in the different specifications: Economic Policy Uncertainty Index (EPU), US oil option implied volatility index (VIX OIL) and US gold option implied volatility index (VIX GOLD).

Table C.32: Japan - US global measures

| Dependent variable: Online Pornographic Videos Accesses |                        |                      |                     |
|---------------------------------------------------------|------------------------|----------------------|---------------------|
| Independent variable: Volatility Measures               |                        |                      |                     |
|                                                         | EPU                    | VIX OIL              | VIX GOLD            |
| Nagoya                                                  | -0.000283<br>(0.00864) | 0.442***<br>(0.0416) | 0.862***<br>(0.209) |
| $R^2$                                                   | 0.000                  | 0.210                | 0.058               |
| Observations                                            | 366                    | 251                  | 251                 |
| Osaka                                                   | 0.00548<br>(0.00892)   | 0.202***<br>(0.0507) | -0.182<br>(0.244)   |
| $R^2$                                                   | 0.001                  | 0.044                | 0.003               |
| Observations                                            | 366                    | 251                  | 251                 |
| Tokyo                                                   | 0.0318**<br>(0.0129)   | 0.0140<br>(0.0541)   | -0.182<br>(0.248)   |
| $R^2$                                                   | 0.029                  | 0.000                | 0.002               |
| Observations                                            | 366                    | 251                  | 251                 |
| Yokohama                                                | -0.0479***<br>(0.0136) | 0.695***<br>(0.0560) | 0.977***<br>(0.262) |
| $R^2$                                                   | 0.048                  | 0.349                | 0.050               |
| Observations                                            | 366                    | 251                  | 251                 |

Robust standard errors in parentheses. Statistical significance levels: \*  $p < 0.1$ , \*\*  $p < 0.05$ , \*\*\*  $p < 0.01$ .

The following US global measures are used in the different specifications: Economic Policy Uncertainty Index (EPU), US oil option implied volatility index (VIX OIL) and US gold option implied volatility index (VIX GOLD).

Table C.33: Singapore - US global measures

| Dependent variable: Online Pornographic Videos Accesses |                       |                      |                      |
|---------------------------------------------------------|-----------------------|----------------------|----------------------|
| Independent variable: Volatility Measures               |                       |                      |                      |
|                                                         | EPU                   | VIX OIL              | VIX GOLD             |
| Singapore                                               | 0.0118**<br>(0.00556) | 0.125***<br>(0.0238) | 0.552***<br>(0.0942) |
| $R^2$                                                   | 0.009                 | 0.064                | 0.090                |
| Observations                                            | 366                   | 251                  | 251                  |

Robust standard errors in parentheses. Statistical significance levels: \*  $p < 0.1$ , \*\*  $p < 0.05$ , \*\*\*  $p < 0.01$ .

The following US global measures are used in the different specifications: Economic Policy Uncertainty Index (EPU), US oil option implied volatility index (VIX OIL) and US gold option implied volatility index (VIX GOLD).

Table C.34: Switzerland - US global measures

| Dependent variable: Online Pornographic Videos Accesses |                       |                       |                   |
|---------------------------------------------------------|-----------------------|-----------------------|-------------------|
| Independent variable: Volatility Measures               |                       |                       |                   |
|                                                         | EPU                   | VIX OIL               | VIX GOLD          |
| Bern                                                    | 0.0505***<br>(0.0123) | -0.285***<br>(0.0517) | -0.144<br>(0.244) |
| $R^2$                                                   | 0.073                 | 0.078                 | 0.001             |
| Observations                                            | 366                   | 251                   | 251               |

|              |                      |                       |                      |
|--------------|----------------------|-----------------------|----------------------|
| Zurich       | 0.0122*<br>(0.00651) | -0.336***<br>(0.0255) | -1.176***<br>(0.131) |
| $R^2$        | 0.009                | 0.219                 | 0.193                |
| Observations | 366                  | 251                   | 251                  |

Robust standard errors in parentheses. Statistical significance levels: \*  $p < 0.1$ , \*\*  $p < 0.05$ , \*\*\*  $p < 0.01$ .

The following US global measures are used in the different specifications: Economic Policy Uncertainty Index (EPU), US oil option implied volatility index (VIX OIL) and US gold option implied volatility index (VIX GOLD).

Table C.35: United Kingdom - US global measures

| Dependent variable: Online Pornographic Videos Accesses |                        |                        |                      |
|---------------------------------------------------------|------------------------|------------------------|----------------------|
| Independent variable: Volatility Measures               |                        |                        |                      |
|                                                         | EPU                    | VIX OIL                | VIX GOLD             |
| Birmingham                                              | -0.00540<br>(0.00680)  | 0.0243<br>(0.0393)     | 0.107<br>(0.126)     |
| $R^2$                                                   | 0.003                  | 0.002                  | 0.002                |
| Observations                                            | 366                    | 251                    | 251                  |
| Glasgow                                                 | 0.0334***<br>(0.00792) | -0.268***<br>(0.0289)  | -0.427***<br>(0.139) |
| $R^2$                                                   | 0.073                  | 0.169                  | 0.031                |
| Observations                                            | 366                    | 251                    | 251                  |
| Leeds                                                   | 0.0262**<br>(0.0110)   | -0.367***<br>(0.0322)  | -1.155***<br>(0.148) |
| $R^2$                                                   | 0.028                  | 0.157                  | 0.112                |
| Observations                                            | 366                    | 251                    | 251                  |
| London                                                  | 0.00670<br>(0.00610)   | -0.0627***<br>(0.0236) | -0.157<br>(0.104)    |
| $R^2$                                                   | 0.006                  | 0.016                  | 0.007                |
| Observations                                            | 366                    | 251                    | 251                  |
| Sheffield                                               | 0.0268***<br>(0.00991) | -0.0179<br>(0.0397)    | 0.520***<br>(0.177)  |
| $R^2$                                                   | 0.045                  | 0.001                  | 0.036                |
| Observations                                            | 366                    | 251                    | 251                  |

Robust standard errors in parentheses. Statistical significance levels: \*  $p < 0.1$ , \*\*  $p < 0.05$ , \*\*\*  $p < 0.01$ .

The following US global measures are used in the different specifications: Economic Policy Uncertainty Index (EPU), US oil option implied volatility index (VIX OIL) and US gold option implied volatility index (VIX GOLD).



Table C.36: United States - US global measures

| Dependent variable: Online Pornographic Videos Accesses |                                           |                       |                      |
|---------------------------------------------------------|-------------------------------------------|-----------------------|----------------------|
|                                                         | Independent variable: Volatility Measures |                       |                      |
|                                                         | EPU                                       | VIX OIL               | VIX GOLD             |
| Chicago                                                 | 0.0568***<br>(0.0154)                     | -0.785***<br>(0.0484) | -2.059***<br>(0.246) |
| $R^2$                                                   | 0.053                                     | 0.288                 | 0.143                |
| Observations                                            | 366                                       | 251                   | 251                  |
| Dallas                                                  | 0.0582***<br>(0.0177)                     | -1.244***<br>(0.0504) | -3.498***<br>(0.293) |
| $R^2$                                                   | 0.037                                     | 0.472                 | 0.269                |
| Observations                                            | 366                                       | 251                   | 251                  |
| Houston                                                 | -0.0532***<br>(0.0128)                    | 1.201***<br>(0.0732)  | 3.385***<br>(0.316)  |
| $R^2$                                                   | 0.034                                     | 0.474                 | 0.272                |
| Observations                                            | 366                                       | 251                   | 251                  |
| Los Angeles                                             | -0.0232***<br>(0.00718)                   | -0.268***<br>(0.0281) | -1.251***<br>(0.179) |
| $R^2$                                                   | 0.024                                     | 0.096                 | 0.150                |
| Observations                                            | 366                                       | 251                   | 251                  |
| Miami                                                   | 0.00482<br>(0.0203)                       | -1.232***<br>(0.0835) | -4.330***<br>(0.419) |
| $R^2$                                                   | 0.000                                     | 0.262                 | 0.234                |
| Observations                                            | 366                                       | 251                   | 251                  |
| New York                                                | -0.0389***<br>(0.0121)                    | -0.590***<br>(0.0539) | -1.816***<br>(0.276) |
| $R^2$                                                   | 0.017                                     | 0.107                 | 0.073                |
| Observations                                            | 366                                       | 251                   | 251                  |
| Philadelphia                                            | 0.0403***<br>(0.0121)                     | -1.111***<br>(0.0516) | -3.386***<br>(0.293) |
| $R^2$                                                   | 0.022                                     | 0.457                 | 0.306                |
| Observations                                            | 366                                       | 251                   | 251                  |
| Phoenix                                                 | -0.00441<br>(0.00466)                     | -0.156***<br>(0.0280) | -0.725***<br>(0.112) |
| $R^2$                                                   | 0.002                                     | 0.079                 | 0.123                |
| Observations                                            | 366                                       | 251                   | 251                  |
| San Antonio                                             | -0.0113<br>(0.0202)                       | -1.693***<br>(0.141)  | -5.572***<br>(0.604) |
| $R^2$                                                   | 0.000                                     | 0.311                 | 0.243                |
| Observations                                            | 366                                       | 251                   | 251                  |
| San Diego                                               | 0.00293<br>(0.00907)                      | 0.118**<br>(0.0512)   | 0.772***<br>(0.225)  |
| $R^2$                                                   | 0.000                                     | 0.012                 | 0.037                |
| Observations                                            | 366                                       | 251                   | 251                  |
| San Francisco                                           | 0.0287***<br>(0.00821)                    | -0.709***<br>(0.0476) | -2.243***<br>(0.231) |
| $R^2$                                                   | 0.021                                     | 0.391                 | 0.282                |
| Observations                                            | 366                                       | 251                   | 251                  |
| Washington                                              | 0.0204<br>(0.0175)                        | -0.678***<br>(0.0633) | -1.822***<br>(0.217) |
| $R^2$                                                   | 0.008                                     | 0.248                 | 0.129                |
| Observations                                            | 366                                       | 251                   | 251                  |

Robust standard errors in parentheses. Statistical significance levels: \*  $p < 0.1$ , \*\*  $p < 0.05$ , \*\*\*  $p < 0.01$ . The following US global measures are used in the different specifications: Economic Policy Uncertainty Index (EPU), US oil option implied volatility index (VIX OIL) and US gold option implied volatility index (VIX GOLD).

## C.10 Country-Level Findings

Table C.37: Contemporary Volatilities

| Dependent variable: Porn Access Index |                      |                      |                      |                      |                       |                       |                       |
|---------------------------------------|----------------------|----------------------|----------------------|----------------------|-----------------------|-----------------------|-----------------------|
| Independent variable:                 | Volatility Measures  |                      |                      |                      |                       |                       |                       |
|                                       | Vol1                 | Vol2                 | Vol3                 | Vol4                 | Vol5                  | Vol6                  | Vol7                  |
| China                                 | 2.218**<br>(0.942)   | 24.20***<br>(4.560)  | 54.68***<br>(6.644)  | 54.45***<br>(6.990)  | 3447.4***<br>(622.9)  | 3486.6***<br>(606.6)  |                       |
| $R^2$                                 | 0.014                | 0.062                | 0.191                | 0.145                | 0.201                 | 0.204                 |                       |
| Observations                          | 260                  | 260                  | 260                  | 260                  | 242                   | 242                   |                       |
| France                                | 0.0874<br>(0.0844)   | 1.916***<br>(0.617)  | 2.066***<br>(0.702)  | 2.334***<br>(0.774)  | 173.7<br>(120.9)      | 148.3<br>(113.1)      | 0.412***<br>(0.106)   |
| $R^2$                                 | 0.002                | 0.021                | 0.021                | 0.024                | 0.007                 | 0.005                 | 0.066                 |
| Observations                          | 260                  | 260                  | 260                  | 260                  | 257                   | 257                   | 257                   |
| Germany                               | -0.917**<br>(0.381)  | -15.44***<br>(1.453) | -20.78***<br>(2.109) | -22.32***<br>(1.799) | -1933.7***<br>(277.0) | -1931.7***<br>(270.5) | -1.771***<br>(0.131)  |
| $R^2$                                 | 0.048                | 0.324                | 0.362                | 0.399                | 0.277                 | 0.272                 | 0.383                 |
| Observations                          | 260                  | 260                  | 260                  | 260                  | 255                   | 255                   | 255                   |
| Italy                                 | -0.133<br>(0.0810)   | -5.381***<br>(0.792) | -3.986***<br>(1.161) | -3.426**<br>(1.539)  | -1114.2***<br>(116.8) | -1157.3***<br>(121.0) |                       |
| $R^2$                                 | 0.023                | 0.209                | 0.101                | 0.069                | 0.220                 | 0.241                 |                       |
| Observations                          | 260                  | 260                  | 260                  | 260                  | 256                   | 256                   |                       |
| Japan                                 | 0.127<br>(0.0839)    | 2.746***<br>(0.660)  | 3.261***<br>(0.823)  | 2.587***<br>(0.932)  | 182.0**<br>(86.78)    | 223.5**<br>(101.6)    | 0.181**<br>(0.0899)   |
| $R^2$                                 | 0.010                | 0.063                | 0.064                | 0.032                | 0.025                 | 0.027                 | 0.017                 |
| Observations                          | 260                  | 260                  | 260                  | 260                  | 242                   | 242                   | 243                   |
| Singapore                             | 0.282<br>(0.177)     | 3.871***<br>(0.793)  | 5.322***<br>(1.124)  | 5.547***<br>(0.917)  | 460.8**<br>(184.7)    | 589.9***<br>(205.6)   |                       |
| $R^2$                                 | 0.005                | 0.064                | 0.069                | 0.084                | 0.037                 | 0.045                 |                       |
| Observations                          | 260                  | 260                  | 260                  | 260                  | 251                   | 251                   |                       |
| Switzerland                           | -1.031***<br>(0.261) | -7.680***<br>(0.798) | -11.43***<br>(1.143) | -8.666***<br>(1.322) | -882.8***<br>(186.9)  | -1023.5***<br>(174.8) | -0.488***<br>(0.101)  |
| $R^2$                                 | 0.041                | 0.162                | 0.164                | 0.096                | 0.117                 | 0.135                 | 0.075                 |
| Observations                          | 260                  | 260                  | 260                  | 260                  | 253                   | 253                   | 253                   |
| United Kingdom                        | -0.427***<br>(0.143) | -3.126***<br>(0.549) | -3.922***<br>(0.715) | -3.779***<br>(1.018) | -114.5***<br>(33.97)  | -146.3***<br>(44.24)  | -0.156***<br>(0.0588) |
| $R^2$                                 | 0.021                | 0.075                | 0.065                | 0.042                | 0.023                 | 0.026                 | 0.020                 |
| Observations                          | 260                  | 260                  | 260                  | 260                  | 252                   | 252                   | 257                   |
| United States                         | -0.258<br>(0.284)    | -3.812***<br>(1.400) | -6.348*<br>(3.834)   | -5.796<br>(4.549)    | -1172.5***<br>(191.9) | -1220.1***<br>(206.4) | -1.098***<br>(0.154)  |
| $R^2$                                 | 0.005                | 0.028                | 0.014                | 0.009                | 0.148                 | 0.160                 | 0.164                 |
| Observations                          | 260                  | 260                  | 260                  | 260                  | 251                   | 251                   | 251                   |

Robust standard errors in parentheses. Statistical significance levels: \*  $p < 0.1$ , \*\*  $p < 0.05$ , \*\*\*  $p < 0.01$ . The following volatility measures are used in the different specifications: daily returns squared (Vol1), volatility within 2-weeks rolling window (Vol2), GARCH estimated volatility (Vol3), EGARCH estimated volatility (Vol4), realised volatility with intraday average computed every 10 minutes (Vol5), realised volatility with intraday average computed every 5 minutes (Vol6) and option implied volatility index (Vol7).

Table C.38: Lagged Volatilities

| Dependent variable: Porn Access Index |                      |                      |                      |                      |                       |                       |                       |
|---------------------------------------|----------------------|----------------------|----------------------|----------------------|-----------------------|-----------------------|-----------------------|
| Independent variable:                 | Volatility Measures  |                      |                      |                      |                       |                       |                       |
|                                       | Vol1                 | Vol2                 | Vol3                 | Vol4                 | Vol5                  | Vol6                  | Vol7                  |
| China                                 | 2.355***<br>(0.867)  | 24.54***<br>(4.507)  | 54.50***<br>(6.519)  | 54.68***<br>(6.844)  | 3588.5***<br>(619.7)  | 3657.4***<br>(591.4)  |                       |
| $R^2$                                 | 0.016                | 0.063                | 0.191                | 0.148                | 0.215                 | 0.221                 |                       |
| Observations                          | 261                  | 261                  | 261                  | 261                  | 243                   | 243                   |                       |
| France                                | 0.0109<br>(0.0616)   | 1.646***<br>(0.634)  | 1.832***<br>(0.706)  | 2.018**<br>(0.780)   | 116.2<br>(116.9)      | 100.7<br>(108.0)      | 0.430***<br>(0.102)   |
| $R^2$                                 | 0.000                | 0.016                | 0.017                | 0.019                | 0.003                 | 0.002                 | 0.074                 |
| Observations                          | 261                  | 261                  | 261                  | 261                  | 258                   | 258                   | 258                   |
| Germany                               | -0.940**<br>(0.404)  | -15.15***<br>(1.458) | -20.43***<br>(2.063) | -21.94***<br>(1.766) | -1912.7***<br>(280.8) | -1920.6***<br>(273.5) | -1.750***<br>(0.130)  |
| $R^2$                                 | 0.050                | 0.310                | 0.350                | 0.388                | 0.271                 | 0.269                 | 0.376                 |
| Observations                          | 261                  | 261                  | 261                  | 261                  | 256                   | 256                   | 256                   |
| Italy                                 | -0.127<br>(0.0798)   | -5.411***<br>(0.788) | -3.943***<br>(1.207) | -3.257**<br>(1.579)  | -1035.2***<br>(116.3) | -1087.1***<br>(118.3) |                       |
| $R^2$                                 | 0.021                | 0.219                | 0.104                | 0.065                | 0.193                 | 0.216                 |                       |
| Observations                          | 261                  | 261                  | 261                  | 261                  | 257                   | 257                   |                       |
| Japan                                 | 0.243**<br>(0.101)   | 3.217***<br>(0.746)  | 3.860***<br>(0.957)  | 3.612***<br>(1.029)  | 341.5***<br>(99.99)   | 414.6***<br>(119.2)   | 0.294***<br>(0.113)   |
| $R^2$                                 | 0.032                | 0.071                | 0.074                | 0.053                | 0.067                 | 0.070                 | 0.034                 |
| Observations                          | 261                  | 261                  | 261                  | 261                  | 243                   | 243                   | 244                   |
| Singapore                             | 0.653**<br>(0.293)   | 5.050***<br>(1.229)  | 7.647***<br>(1.727)  | 7.663***<br>(1.538)  | 646.1***<br>(218.7)   | 772.2***<br>(247.6)   |                       |
| $R^2$                                 | 0.013                | 0.052                | 0.068                | 0.077                | 0.031                 | 0.033                 |                       |
| Observations                          | 261                  | 261                  | 261                  | 261                  | 252                   | 252                   |                       |
| Switzerland                           | -0.815***<br>(0.299) | -7.013***<br>(0.922) | -10.78***<br>(1.222) | -7.902***<br>(1.355) | -698.4***<br>(214.3)  | -848.1***<br>(203.3)  | -0.421***<br>(0.0980) |
| $R^2$                                 | 0.028                | 0.140                | 0.150                | 0.084                | 0.076                 | 0.096                 | 0.058                 |
| Observations                          | 261                  | 261                  | 261                  | 261                  | 254                   | 254                   | 254                   |
| United Kingdom                        | -0.407***<br>(0.120) | -3.022***<br>(0.518) | -3.704***<br>(0.660) | -3.370***<br>(0.880) | -64.73<br>(39.45)     | -88.17*<br>(50.63)    | -0.169***<br>(0.0536) |
| $R^2$                                 | 0.023                | 0.083                | 0.070                | 0.041                | 0.008                 | 0.011                 | 0.027                 |
| Observations                          | 261                  | 261                  | 261                  | 261                  | 253                   | 253                   | 258                   |
| United States                         | -0.373<br>(0.285)    | -4.216***<br>(1.351) | -6.204*<br>(3.595)   | -5.761<br>(4.216)    | -1203.0***<br>(190.3) | -1247.4***<br>(200.0) | -1.093***<br>(0.152)  |
| $R^2$                                 | 0.011                | 0.035                | 0.014                | 0.009                | 0.165                 | 0.178                 | 0.171                 |
| Observations                          | 261                  | 261                  | 261                  | 261                  | 252                   | 252                   | 252                   |

Robust standard errors in parentheses. Statistical significance levels: \*  $p < 0.1$ , \*\*  $p < 0.05$ , \*\*\*  $p < 0.01$ .

The following lagged volatility measures are used in the different specifications: daily returns squared (Vol1), volatility within 2-weeks rolling window (Vol2), GARCH estimated volatility (Vol3), EGARCH estimated volatility (Vol4), realised volatility with intraday average computed every 10 minutes (Vol5), realised volatility with intraday average computed every 5 minutes (Vol6) and option implied volatility index (Vol7).

Table C.39: US Volatilities

| Dependent variable: Porn Access Index     |                     |                      |                    |                    |                       |                       |                      |
|-------------------------------------------|---------------------|----------------------|--------------------|--------------------|-----------------------|-----------------------|----------------------|
| Independent variable: Volatility Measures | Volatility Measures |                      |                    |                    |                       |                       |                      |
|                                           | Vol1                | Vol2                 | Vol3               | Vol4               | Vol5                  | Vol6                  | Vol7                 |
| China                                     | -0.652<br>(0.752)   | 1.749<br>(5.544)     | -2.477<br>(12.12)  | 1.983<br>(14.76)   | 2070.4***<br>(746.2)  | 2135.3***<br>(769.0)  | 1.544***<br>(0.546)  |
| $R^2$                                     | 0.002               | 0.000                | 0.000              | 0.000              | 0.028                 | 0.030                 | 0.020                |
| Observations                              | 260                 | 260                  | 260                | 260                | 251                   | 251                   | 251                  |
| France                                    | -0.255<br>(0.185)   | -2.791***<br>(1.002) | -4.710*<br>(2.573) | -5.736*<br>(3.084) | 45.96<br>(143.1)      | 13.13<br>(137.8)      | 0.216<br>(0.144)     |
| $R^2$                                     | 0.007               | 0.021                | 0.011              | 0.012              | 0.000                 | 0.000                 | 0.009                |
| Observations                              | 260                 | 260                  | 260                | 260                | 251                   | 251                   | 251                  |
| Germany                                   | -0.182<br>(0.367)   | 0.977<br>(2.091)     | -2.820<br>(4.896)  | -1.489<br>(5.886)  | -1482.4***<br>(229.2) | -1515.0***<br>(227.7) | -1.439***<br>(0.208) |
| $R^2$                                     | 0.001               | 0.001                | 0.001              | 0.000              | 0.105                 | 0.109                 | 0.125                |
| Observations                              | 260                 | 260                  | 260                | 260                | 251                   | 251                   | 251                  |
| Italy                                     | -0.269<br>(0.375)   | -1.160<br>(1.698)    | -6.025<br>(4.436)  | -4.735<br>(5.411)  | -1200.6***<br>(207.2) | -1250.5***<br>(214.8) | -1.003***<br>(0.201) |
| $R^2$                                     | 0.004               | 0.002                | 0.009              | 0.004              | 0.115                 | 0.125                 | 0.102                |
| Observations                              | 260                 | 260                  | 260                | 260                | 251                   | 251                   | 251                  |
| Japan                                     | 0.167<br>(0.223)    | 4.293***<br>(1.405)  | 6.191<br>(3.805)   | 7.983**<br>(4.042) | 761.0***<br>(225.6)   | 815.0***<br>(241.7)   | 0.752***<br>(0.153)  |
| $R^2$                                     | 0.002               | 0.042                | 0.016              | 0.019              | 0.074                 | 0.084                 | 0.091                |
| Observations                              | 260                 | 260                  | 260                | 260                | 251                   | 251                   | 251                  |
| Singapore                                 | -0.0735<br>(0.188)  | 2.454***<br>(0.755)  | 0.437<br>(2.562)   | 0.0374<br>(3.215)  | 322.2***<br>(104.4)   | 325.8***<br>(102.2)   | 0.406***<br>(0.0707) |
| $R^2$                                     | 0.001               | 0.040                | 0.000              | 0.000              | 0.041                 | 0.042                 | 0.083                |
| Observations                              | 260                 | 260                  | 260                | 260                | 251                   | 251                   | 251                  |
| Switzerland                               | -0.160<br>(0.228)   | -0.555<br>(1.241)    | -3.738<br>(2.801)  | -2.220<br>(3.319)  | -689.7***<br>(135.0)  | -718.6***<br>(135.6)  | -0.456***<br>(0.136) |
| $R^2$                                     | 0.003               | 0.001                | 0.007              | 0.002              | 0.076                 | 0.082                 | 0.042                |
| Observations                              | 260                 | 260                  | 260                | 260                | 251                   | 251                   | 251                  |
| United Kingdom                            | -0.0667<br>(0.164)  | 0.120<br>(0.862)     | -0.636<br>(2.048)  | -0.135<br>(2.422)  | -323.2***<br>(85.32)  | -350.6***<br>(79.34)  | -0.131<br>(0.0995)   |
| $R^2$                                     | 0.001               | 0.000                | 0.000              | 0.000              | 0.036                 | 0.043                 | 0.008                |
| Observations                              | 260                 | 260                  | 260                | 260                | 251                   | 251                   | 251                  |

Robust standard errors in parentheses. Statistical significance levels: \*  $p < 0.1$ , \*\*  $p < 0.05$ , \*\*\*  $p < 0.01$ . The following US lagged volatility measures are used in the different specifications: daily returns squared (Vol1), volatility within 2-weeks rolling window (Vol2), GARCH estimated volatility (Vol3), EGARCH estimated volatility (Vol4), realised volatility with intraday average computed every 10 minutes (Vol5), realised volatility with intraday average computed every 5 minutes (Vol6) and option implied volatility index (Vol7).

Table C.40: US Global Measures

| Dependent variable: Porn Access Index |                                           |                       |                      |
|---------------------------------------|-------------------------------------------|-----------------------|----------------------|
|                                       | Independent variable: Volatility Measures |                       |                      |
|                                       | EPU                                       | VIX OIL               | VIX GOLD             |
| China                                 | -0.0820***<br>(0.0257)                    | 1.297***<br>(0.169)   | 5.324***<br>(0.724)  |
| $R^2$                                 | 0.016                                     | 0.115                 | 0.139                |
| Observations                          | 366                                       | 251                   | 251                  |
| France                                | -0.0200**<br>(0.00791)                    | 0.00848<br>(0.0475)   | 0.489***<br>(0.183)  |
| $R^2$                                 | 0.020                                     | 0.000                 | 0.027                |
| Observations                          | 366                                       | 251                   | 251                  |
| Germany                               | 0.0657***<br>(0.0218)                     | -0.759***<br>(0.0600) | -2.670***<br>(0.252) |
| $R^2$                                 | 0.076                                     | 0.282                 | 0.252                |
| Observations                          | 366                                       | 251                   | 251                  |
| Italy                                 | 0.0252**<br>(0.0110)                      | -0.620***<br>(0.0373) | -1.456***<br>(0.231) |
| $R^2$                                 | 0.018                                     | 0.316                 | 0.126                |
| Observations                          | 366                                       | 251                   | 251                  |
| Japan                                 | -0.00266<br>(0.00809)                     | 0.338***<br>(0.0427)  | 0.369*<br>(0.219)    |
| $R^2$                                 | 0.000                                     | 0.150                 | 0.013                |
| Observations                          | 366                                       | 251                   | 251                  |
| Singapore                             | 0.0118**<br>(0.00556)                     | 0.125***<br>(0.0238)  | 0.552***<br>(0.0942) |
| $R^2$                                 | 0.009                                     | 0.064                 | 0.090                |
| Observations                          | 366                                       | 251                   | 251                  |
| Switzerland                           | 0.0313***<br>(0.00894)                    | -0.310***<br>(0.0307) | -0.660***<br>(0.159) |
| $R^2$                                 | 0.051                                     | 0.157                 | 0.051                |
| Observations                          | 366                                       | 251                   | 251                  |
| United Kingdom                        | 0.0175**<br>(0.00704)                     | -0.138***<br>(0.0236) | -0.222**<br>(0.111)  |
| $R^2$                                 | 0.035                                     | 0.068                 | 0.013                |
| Observations                          | 366                                       | 251                   | 251                  |
| United States                         | 0.00677<br>(0.00742)                      | -0.596***<br>(0.0336) | -1.879***<br>(0.177) |
| $R^2$                                 | 0.002                                     | 0.391                 | 0.281                |
| Observations                          | 366                                       | 251                   | 251                  |

Robust standard errors in parentheses. Statistical significance levels: \*  $p < 0.1$ , \*\*  $p < 0.05$ , \*\*\*  $p < 0.01$ .

The following US global measures are used in the different specifications: Economic Policy Uncertainty Index (EPU), US oil option implied volatility index (VIX OIL) and US gold option implied volatility index (VIX GOLD).

Table C.41: Contemporary Volatilities - Financial Cities

| Dependent variable: Porn Access Index |                             |                      |                      |                      |                       |                       |                       |
|---------------------------------------|-----------------------------|----------------------|----------------------|----------------------|-----------------------|-----------------------|-----------------------|
| Independent variable:                 | Volatility Measures<br>Vol1 | Vol2                 | Vol3                 | Vol4                 | Vol5                  | Vol6                  | Vol7                  |
| China                                 | -0.0852<br>(0.365)          | -3.359<br>(2.156)    | 2.237<br>(2.859)     | -1.080<br>(3.037)    | 618.2***<br>(190.7)   | 599.2***<br>(188.7)   |                       |
| $R^2$                                 | 0.000                       | 0.007                | 0.002                | 0.000                | 0.041                 | 0.038                 |                       |
| Observations                          | 260                         | 260                  | 260                  | 260                  | 242                   | 242                   |                       |
| France                                | -0.559**<br>(0.256)         | -11.75***<br>(1.230) | -13.69***<br>(1.649) | -14.26***<br>(1.661) | -1650.2***<br>(291.8) | -1710.7***<br>(286.0) | -1.535***<br>(0.142)  |
| $R^2$                                 | 0.042                       | 0.341                | 0.386                | 0.384                | 0.250                 | 0.290                 | 0.381                 |
| Observations                          | 260                         | 260                  | 260                  | 260                  | 257                   | 257                   | 257                   |
| Germany                               | -2.819**<br>(1.322)         | -50.79***<br>(4.666) | -67.49***<br>(6.557) | -73.68***<br>(5.783) | -6069.8***<br>(927.7) | -6101.7***<br>(917.7) | -5.914***<br>(0.407)  |
| $R^2$                                 | 0.050                       | 0.390                | 0.425                | 0.483                | 0.305                 | 0.303                 | 0.477                 |
| Observations                          | 260                         | 260                  | 260                  | 260                  | 255                   | 255                   | 255                   |
| Italy                                 | -0.0804**<br>(0.0374)       | -2.693***<br>(0.500) | -1.941***<br>(0.589) | -1.746**<br>(0.733)  | -379.9***<br>(103.8)  | -385.0***<br>(102.9)  |                       |
| $R^2$                                 | 0.010                       | 0.063                | 0.029                | 0.021                | 0.031                 | 0.032                 |                       |
| Observations                          | 260                         | 260                  | 260                  | 260                  | 256                   | 256                   |                       |
| Japan                                 | 0.0128<br>(0.0878)          | -0.562<br>(0.775)    | -0.348<br>(0.948)    | -3.067***<br>(1.085) | -65.42<br>(94.91)     | -96.35<br>(116.0)     | -0.388***<br>(0.108)  |
| $R^2$                                 | 0.000                       | 0.002                | 0.001                | 0.032                | 0.002                 | 0.004                 | 0.056                 |
| Observations                          | 260                         | 260                  | 260                  | 260                  | 242                   | 242                   | 243                   |
| Singapore                             | 0.282<br>(0.177)            | 3.871***<br>(0.793)  | 5.322***<br>(1.124)  | 5.547***<br>(0.917)  | 460.8**<br>(184.7)    | 589.9***<br>(205.6)   |                       |
| $R^2$                                 | 0.005                       | 0.064                | 0.069                | 0.084                | 0.037                 | 0.045                 |                       |
| Observations                          | 260                         | 260                  | 260                  | 260                  | 251                   | 251                   |                       |
| Switzerland                           | -1.018***<br>(0.210)        | -8.055***<br>(0.710) | -12.18***<br>(1.132) | -9.819***<br>(1.196) | -985.2***<br>(170.9)  | -1140.8***<br>(158.9) | -0.650***<br>(0.0926) |
| $R^2$                                 | 0.047                       | 0.211                | 0.220                | 0.147                | 0.172                 | 0.199                 | 0.157                 |
| Observations                          | 260                         | 260                  | 260                  | 260                  | 253                   | 253                   | 253                   |
| United Kingdom                        | -0.440***<br>(0.128)        | -2.334***<br>(0.509) | -3.255***<br>(0.639) | -3.014***<br>(0.913) | -123.6***<br>(26.23)  | -144.3***<br>(35.93)  | -0.166***<br>(0.0511) |
| $R^2$                                 | 0.026                       | 0.048                | 0.051                | 0.031                | 0.030                 | 0.029                 | 0.026                 |
| Observations                          | 260                         | 260                  | 260                  | 260                  | 252                   | 252                   | 257                   |
| United States                         | -0.387<br>(0.343)           | -4.435***<br>(1.658) | -8.151*<br>(4.649)   | -7.842<br>(5.434)    | -1397.8***<br>(206.0) | -1423.5***<br>(216.8) | -1.273***<br>(0.172)  |
| $R^2$                                 | 0.007                       | 0.025                | 0.015                | 0.010                | 0.138                 | 0.143                 | 0.145                 |
| Observations                          | 260                         | 260                  | 260                  | 260                  | 251                   | 251                   | 251                   |

Robust standard errors in parentheses. Statistical significance levels: \*  $p < 0.1$ , \*\*  $p < 0.05$ , \*\*\*  $p < 0.01$ .

The following volatility measures are used in the different specifications: daily returns squared (Vol1), volatility within 2-weeks rolling window (Vol2), GARCH estimated volatility (Vol3), EGARCH estimated volatility (Vol4), realised volatility with intraday average computed every 10 minutes (Vol5), realised volatility with intraday average computed every 5 minutes (Vol6) and option implied volatility index (Vol7).

Table C.42: Contemporary Volatilities - Non-Financial Cities

| Dependent variable: Porn Access Index |                       |                      |                      |                      |                       |                       |                       |
|---------------------------------------|-----------------------|----------------------|----------------------|----------------------|-----------------------|-----------------------|-----------------------|
| Independent variable:                 | Volatility Measures   |                      |                      |                      |                       |                       |                       |
|                                       | Vol1                  | Vol2                 | Vol3                 | Vol4                 | Vol5                  | Vol6                  | Vol7                  |
| China                                 | 3.369***<br>(1.268)   | 37.98***<br>(5.906)  | 80.89***<br>(8.662)  | 82.22***<br>(9.121)  | 4862.0***<br>(854.6)  | 4930.3***<br>(832.3)  |                       |
| $R^2$                                 | 0.018                 | 0.084                | 0.232                | 0.184                | 0.223                 | 0.227                 |                       |
| Observations                          | 260                   | 260                  | 260                  | 260                  | 242                   | 242                   |                       |
| France                                | 0.249*<br>(0.150)     | 5.333***<br>(0.764)  | 6.004***<br>(0.866)  | 6.482***<br>(0.946)  | 629.7***<br>(174.1)   | 613.1***<br>(166.5)   | 0.899***<br>(0.119)   |
| $R^2$                                 | 0.012                 | 0.101                | 0.107                | 0.114                | 0.053                 | 0.054                 | 0.190                 |
| Observations                          | 260                   | 260                  | 260                  | 260                  | 257                   | 257                   | 257                   |
| Germany                               | -0.283***<br>(0.0852) | -3.655***<br>(0.629) | -5.209***<br>(0.879) | -5.199***<br>(0.797) | -555.0***<br>(89.78)  | -541.7***<br>(86.17)  | -0.390***<br>(0.0658) |
| $R^2$                                 | 0.021                 | 0.082                | 0.102                | 0.097                | 0.103                 | 0.097                 | 0.084                 |
| Observations                          | 260                   | 260                  | 260                  | 260                  | 255                   | 255                   | 255                   |
| Italy                                 | -0.151<br>(0.0960)    | -6.276***<br>(0.920) | -4.667***<br>(1.383) | -3.986**<br>(1.832)  | -1359.0***<br>(132.8) | -1414.7***<br>(138.6) |                       |
| $R^2$                                 | 0.023                 | 0.228                | 0.111                | 0.075                | 0.260                 | 0.286                 |                       |
| Observations                          | 260                   | 260                  | 260                  | 260                  | 256                   | 256                   |                       |
| Japan                                 | 0.165*<br>(0.0920)    | 3.849***<br>(0.689)  | 4.464***<br>(0.867)  | 4.471***<br>(0.972)  | 264.5***<br>(100.3)   | 330.1***<br>(118.2)   | 0.370***<br>(0.0912)  |
| $R^2$                                 | 0.016                 | 0.113                | 0.109                | 0.087                | 0.047                 | 0.052                 | 0.063                 |
| Observations                          | 260                   | 260                  | 260                  | 260                  | 242                   | 242                   | 243                   |
| Switzerland                           | -1.043***<br>(0.355)  | -7.306***<br>(1.252) | -10.68***<br>(1.752) | -7.513***<br>(1.925) | -780.5***<br>(232.3)  | -906.2***<br>(230.2)  | -0.327**<br>(0.137)   |
| $R^2$                                 | 0.025                 | 0.086                | 0.084                | 0.042                | 0.054                 | 0.063                 | 0.020                 |
| Observations                          | 260                   | 260                  | 260                  | 260                  | 253                   | 253                   | 253                   |
| United Kingdom                        | -0.424***<br>(0.154)  | -3.324***<br>(0.599) | -4.089***<br>(0.783) | -3.971***<br>(1.104) | -112.2***<br>(37.40)  | -146.8***<br>(49.12)  | -0.153**<br>(0.0645)  |
| $R^2$                                 | 0.018                 | 0.073                | 0.061                | 0.040                | 0.019                 | 0.023                 | 0.016                 |
| Observations                          | 260                   | 260                  | 260                  | 260                  | 252                   | 252                   | 257                   |
| United States                         | -0.232<br>(0.276)     | -3.687***<br>(1.393) | -5.987<br>(3.761)    | -5.387<br>(4.485)    | -1127.4***<br>(192.9) | -1179.4***<br>(207.9) | -1.063***<br>(0.154)  |
| $R^2$                                 | 0.004                 | 0.026                | 0.012                | 0.007                | 0.136                 | 0.149                 | 0.154                 |
| Observations                          | 260                   | 260                  | 260                  | 260                  | 251                   | 251                   | 251                   |

Robust standard errors in parentheses. Statistical significance levels: \*  $p < 0.1$ , \*\*  $p < 0.05$ , \*\*\*  $p < 0.01$ . The following volatility measures are used in the different specifications: daily returns squared (Vol1), volatility within 2-weeks rolling window (Vol2), GARCH estimated volatility (Vol3), EGARCH estimated volatility (Vol4), realised volatility with intraday average computed every 10 minutes (Vol5), realised volatility with intraday average computed every 5 minutes (Vol6) and option implied volatility index (Vol7).

Table C.43: Lagged Volatilities - Financial Cities

| Dependent variable: Porn Access Index |                             |                      |                      |                      |                       |                       |                       |
|---------------------------------------|-----------------------------|----------------------|----------------------|----------------------|-----------------------|-----------------------|-----------------------|
| Independent variable:                 | Volatility Measures<br>Vol1 | Vol2                 | Vol3                 | Vol4                 | Vol5                  | Vol6                  | Vol7                  |
| China                                 | 0.0294<br>(0.341)           | -3.321<br>(2.170)    | 2.799<br>(2.833)     | -0.0875<br>(2.983)   | 682.1***<br>(212.0)   | 691.5***<br>(202.5)   |                       |
| $R^2$                                 | 0.000                       | 0.007                | 0.003                | 0.000                | 0.047                 | 0.048                 |                       |
| Observations                          | 261                         | 261                  | 261                  | 261                  | 243                   | 243                   |                       |
| France                                | -0.673**<br>(0.289)         | -11.90***<br>(1.271) | -13.68***<br>(1.651) | -14.28***<br>(1.670) | -1711.0***<br>(278.6) | -1768.6***<br>(275.0) | -1.494***<br>(0.138)  |
| $R^2$                                 | 0.060                       | 0.348                | 0.384                | 0.385                | 0.268                 | 0.307                 | 0.360                 |
| Observations                          | 261                         | 261                  | 261                  | 261                  | 258                   | 258                   | 258                   |
| Germany                               | -2.913**<br>(1.365)         | -51.11***<br>(4.635) | -67.64***<br>(6.423) | -73.71***<br>(5.626) | -6094.5***<br>(928.9) | -6149.1***<br>(921.0) | -5.974***<br>(0.403)  |
| $R^2$                                 | 0.053                       | 0.390                | 0.424                | 0.484                | 0.302                 | 0.303                 | 0.482                 |
| Observations                          | 261                         | 261                  | 261                  | 261                  | 256                   | 256                   | 256                   |
| Italy                                 | -0.0788**<br>(0.0332)       | -2.590***<br>(0.493) | -1.755***<br>(0.637) | -1.468*<br>(0.778)   | -317.1***<br>(107.2)  | -330.2***<br>(105.7)  |                       |
| $R^2$                                 | 0.010                       | 0.060                | 0.025                | 0.016                | 0.022                 | 0.024                 |                       |
| Observations                          | 261                         | 261                  | 261                  | 261                  | 257                   | 257                   |                       |
| Japan                                 | 0.137<br>(0.0896)           | -0.0112<br>(0.866)   | 0.101<br>(1.075)     | -2.163*<br>(1.132)   | 115.7<br>(93.64)      | 121.9<br>(112.1)      | -0.278**<br>(0.139)   |
| $R^2$                                 | 0.008                       | 0.000                | 0.000                | 0.014                | 0.006                 | 0.005                 | 0.024                 |
| Observations                          | 261                         | 261                  | 261                  | 261                  | 243                   | 243                   | 244                   |
| Singapore                             | 0.653**<br>(0.293)          | 5.050***<br>(1.229)  | 7.647***<br>(1.727)  | 7.663***<br>(1.538)  | 646.1***<br>(218.7)   | 772.2***<br>(247.6)   |                       |
| $R^2$                                 | 0.013                       | 0.052                | 0.068                | 0.077                | 0.031                 | 0.033                 |                       |
| Observations                          | 261                         | 261                  | 261                  | 261                  | 252                   | 252                   |                       |
| Switzerland                           | -0.860***<br>(0.218)        | -7.695***<br>(0.735) | -11.90***<br>(1.108) | -9.274***<br>(1.194) | -812.4***<br>(184.9)  | -989.3***<br>(182.4)  | -0.586***<br>(0.0848) |
| $R^2$                                 | 0.037                       | 0.196                | 0.214                | 0.135                | 0.121                 | 0.155                 | 0.133                 |
| Observations                          | 261                         | 261                  | 261                  | 261                  | 254                   | 254                   | 254                   |
| United Kingdom                        | -0.469***<br>(0.0977)       | -2.383***<br>(0.479) | -3.021***<br>(0.629) | -2.629***<br>(0.881) | -78.50***<br>(28.28)  | -88.37**<br>(36.01)   | -0.176***<br>(0.0494) |
| $R^2$                                 | 0.033                       | 0.056                | 0.050                | 0.027                | 0.013                 | 0.011                 | 0.032                 |
| Observations                          | 261                         | 261                  | 261                  | 261                  | 253                   | 253                   | 258                   |
| United States                         | -0.460<br>(0.350)           | -4.761***<br>(1.634) | -7.603*<br>(4.553)   | -6.961<br>(5.159)    | -1392.6***<br>(194.2) | -1424.8***<br>(200.9) | -1.243***<br>(0.169)  |
| $R^2$                                 | 0.011                       | 0.029                | 0.013                | 0.008                | 0.143                 | 0.150                 | 0.144                 |
| Observations                          | 261                         | 261                  | 261                  | 261                  | 252                   | 252                   | 252                   |

Robust standard errors in parentheses. Statistical significance levels: \*  $p < 0.1$ , \*\*  $p < 0.05$ , \*\*\*  $p < 0.01$ .

The following lagged volatility measures are used in the different specifications: daily returns squared (Vol1), volatility within 2-weeks rolling window (Vol2), GARCH estimated volatility (Vol3), EGARCH estimated volatility (Vol4), realised volatility with intraday average computed every 10 minutes (Vol5), realised volatility with intraday average computed every 5 minutes (Vol6) and option implied volatility index (Vol7).



Table C.44: Lagged Volatilities - Non-Financial Cities

| Dependent variable: Porn Access Index |                       |                      |                      |                      |                       |                       |                       |
|---------------------------------------|-----------------------|----------------------|----------------------|----------------------|-----------------------|-----------------------|-----------------------|
| Independent variable:                 | Volatility Measures   |                      |                      |                      |                       |                       |                       |
|                                       | Vol1                  | Vol2                 | Vol3                 | Vol4                 | Vol5                  | Vol6                  | Vol7                  |
| China                                 | 3.518***<br>(1.181)   | 38.46***<br>(5.831)  | 80.35***<br>(8.496)  | 82.07***<br>(8.953)  | 5041.8***<br>(838.0)  | 5140.3***<br>(804.1)  |                       |
| $R^2$                                 | 0.020                 | 0.087                | 0.231                | 0.185                | 0.237                 | 0.244                 |                       |
| Observations                          | 261                   | 261                  | 261                  | 261                  | 243                   | 243                   |                       |
| France                                | 0.182<br>(0.127)      | 5.032***<br>(0.752)  | 5.710***<br>(0.862)  | 6.092***<br>(0.941)  | 573.0***<br>(171.2)   | 568.1***<br>(162.8)   | 0.911***<br>(0.112)   |
| $R^2$                                 | 0.007                 | 0.094                | 0.101                | 0.106                | 0.046                 | 0.049                 | 0.205                 |
| Observations                          | 261                   | 261                  | 261                  | 261                  | 258                   | 258                   | 258                   |
| Germany                               | -0.283***<br>(0.0945) | -3.161***<br>(0.677) | -4.686***<br>(0.892) | -4.681***<br>(0.832) | -518.8***<br>(101.8)  | -511.1***<br>(93.66)  | -0.342***<br>(0.0673) |
| $R^2$                                 | 0.020                 | 0.059                | 0.081                | 0.077                | 0.088                 | 0.084                 | 0.063                 |
| Observations                          | 261                   | 261                  | 261                  | 261                  | 256                   | 256                   | 256                   |
| Italy                                 | -0.143<br>(0.0959)    | -6.352***<br>(0.918) | -4.673***<br>(1.425) | -3.853**<br>(1.868)  | -1274.6***<br>(132.0) | -1339.5***<br>(135.8) |                       |
| $R^2$                                 | 0.022                 | 0.240                | 0.116                | 0.073                | 0.233                 | 0.260                 |                       |
| Observations                          | 261                   | 261                  | 261                  | 261                  | 257                   | 257                   |                       |
| Japan                                 | 0.279**<br>(0.108)    | 4.293***<br>(0.763)  | 5.113***<br>(0.994)  | 5.538***<br>(1.062)  | 416.8***<br>(112.9)   | 512.2***<br>(135.6)   | 0.485***<br>(0.111)   |
| $R^2$                                 | 0.038                 | 0.116                | 0.118                | 0.114                | 0.091                 | 0.097                 | 0.085                 |
| Observations                          | 261                   | 261                  | 261                  | 261                  | 243                   | 243                   | 244                   |
| Switzerland                           | -0.770*<br>(0.427)    | -6.331***<br>(1.502) | -9.666***<br>(1.990) | -6.531***<br>(2.072) | -584.5**<br>(277.0)   | -706.9***<br>(270.6)  | -0.255*<br>(0.147)    |
| $R^2$                                 | 0.014                 | 0.062                | 0.066                | 0.031                | 0.029                 | 0.036                 | 0.011                 |
| Observations                          | 261                   | 261                  | 261                  | 261                  | 254                   | 254                   | 254                   |
| United Kingdom                        | -0.391***<br>(0.134)  | -3.182***<br>(0.569) | -3.875***<br>(0.726) | -3.556***<br>(0.942) | -61.28<br>(43.84)     | -88.12<br>(57.43)     | -0.167***<br>(0.0585) |
| $R^2$                                 | 0.018                 | 0.079                | 0.065                | 0.039                | 0.006                 | 0.009                 | 0.023                 |
| Observations                          | 261                   | 261                  | 261                  | 261                  | 253                   | 253                   | 258                   |
| United States                         | -0.355<br>(0.277)     | -4.107***<br>(1.340) | -5.925*<br>(3.495)   | -5.521<br>(4.146)    | -1165.0***<br>(193.5) | -1211.9***<br>(203.6) | -1.063***<br>(0.152)  |
| $R^2$                                 | 0.010                 | 0.034                | 0.013                | 0.008                | 0.155                 | 0.168                 | 0.162                 |
| Observations                          | 261                   | 261                  | 261                  | 261                  | 252                   | 252                   | 252                   |

Robust standard errors in parentheses. Statistical significance levels: \*  $p < 0.1$ , \*\*  $p < 0.05$ , \*\*\*  $p < 0.01$ . The following lagged volatility measures are used in the different specifications: daily returns squared (Vol1), volatility within 2-weeks rolling window (Vol2), GARCH estimated volatility (Vol3), EGARCH estimated volatility (Vol4), realised volatility with intraday average computed every 10 minutes (Vol5), realised volatility with intraday average computed every 5 minutes (Vol6) and option implied volatility index (Vol7).

Table C.45: US Volatilities - Financial Cities

| Dependent variable: Porn Access Index |                                           |                      |                     |                    |                       |                       |                      |
|---------------------------------------|-------------------------------------------|----------------------|---------------------|--------------------|-----------------------|-----------------------|----------------------|
|                                       | Independent variable: Volatility Measures |                      |                     |                    |                       |                       |                      |
|                                       | Vol1                                      | Vol2                 | Vol3                | Vol4               | Vol5                  | Vol6                  | Vol7                 |
| China                                 | -0.337<br>(0.371)                         | -1.402<br>(1.917)    | -4.900<br>(5.103)   | -2.799<br>(5.733)  | -420.8*<br>(248.2)    | -428.9*<br>(241.7)    | -0.485**<br>(0.214)  |
| $R^2$                                 | 0.003                                     | 0.001                | 0.003               | 0.001              | 0.007                 | 0.008                 | 0.012                |
| Observations                          | 260                                       | 260                  | 260                 | 260                | 251                   | 251                   | 251                  |
| France                                | -0.651*<br>(0.363)                        | -5.671***<br>(1.888) | -11.75**<br>(4.704) | -10.11*<br>(5.518) | -1653.3***<br>(223.0) | -1707.2***<br>(233.0) | -1.696***<br>(0.194) |
| $R^2$                                 | 0.019                                     | 0.036                | 0.028               | 0.015              | 0.173                 | 0.185                 | 0.231                |
| Observations                          | 260                                       | 260                  | 260                 | 260                | 251                   | 251                   | 251                  |
| Germany                               | -0.564<br>(1.000)                         | 1.062<br>(5.901)     | -7.664<br>(14.90)   | -0.869<br>(17.71)  | -4860.0***<br>(747.6) | -4966.0***<br>(770.9) | -5.140***<br>(0.595) |
| $R^2$                                 | 0.001                                     | 0.000                | 0.001               | 0.000              | 0.127                 | 0.132                 | 0.179                |
| Observations                          | 260                                       | 260                  | 260                 | 260                | 251                   | 251                   | 251                  |
| Italy                                 | -0.199<br>(0.261)                         | 1.481<br>(1.427)     | -3.259<br>(3.234)   | -1.957<br>(4.059)  | -450.2***<br>(161.7)  | -495.3***<br>(161.6)  | -0.262<br>(0.181)    |
| $R^2$                                 | 0.003                                     | 0.004                | 0.003               | 0.001              | 0.020                 | 0.024                 | 0.008                |
| Observations                          | 260                                       | 260                  | 260                 | 260                | 251                   | 251                   | 251                  |
| Japan                                 | 0.120<br>(0.255)                          | 5.237***<br>(1.569)  | 6.434<br>(4.555)    | 8.886*<br>(5.068)  | 102.0<br>(201.2)      | 132.0<br>(197.4)      | 0.149<br>(0.179)     |
| $R^2$                                 | 0.001                                     | 0.044                | 0.012               | 0.017              | 0.001                 | 0.002                 | 0.003                |
| Observations                          | 260                                       | 260                  | 260                 | 260                | 251                   | 251                   | 251                  |
| Singapore                             | -0.0735<br>(0.188)                        | 2.454***<br>(0.755)  | 0.437<br>(2.562)    | 0.0374<br>(3.215)  | 322.2***<br>(104.4)   | 325.8***<br>(102.2)   | 0.406***<br>(0.0707) |
| $R^2$                                 | 0.001                                     | 0.040                | 0.000               | 0.000              | 0.041                 | 0.042                 | 0.083                |
| Observations                          | 260                                       | 260                  | 260                 | 260                | 251                   | 251                   | 251                  |
| Switzerland                           | -0.244<br>(0.189)                         | -1.688<br>(1.046)    | -4.653**<br>(2.338) | -3.895<br>(2.833)  | -701.5***<br>(104.1)  | -714.4***<br>(106.1)  | -0.585***<br>(0.108) |
| $R^2$                                 | 0.008                                     | 0.010                | 0.013               | 0.007              | 0.093                 | 0.096                 | 0.082                |
| Observations                          | 260                                       | 260                  | 260                 | 260                | 251                   | 251                   | 251                  |
| United Kingdom                        | -0.0432<br>(0.140)                        | 0.536<br>(0.830)     | -0.552<br>(1.773)   | 0.972<br>(2.060)   | -162.5*<br>(97.30)    | -170.2*<br>(95.23)    | -0.133<br>(0.0871)   |
| $R^2$                                 | 0.001                                     | 0.002                | 0.000               | 0.001              | 0.011                 | 0.012                 | 0.009                |
| Observations                          | 260                                       | 260                  | 260                 | 260                | 251                   | 251                   | 251                  |
| United States                         | -0.387<br>(0.343)                         | -4.435***<br>(1.658) | -8.151*<br>(4.649)  | -7.842<br>(5.434)  | -1397.8***<br>(206.0) | -1423.5***<br>(216.8) | -1.273***<br>(0.172) |
| $R^2$                                 | 0.007                                     | 0.025                | 0.015               | 0.010              | 0.138                 | 0.143                 | 0.145                |
| Observations                          | 260                                       | 260                  | 260                 | 260                | 251                   | 251                   | 251                  |

Robust standard errors in parentheses. Statistical significance levels: \*  $p < 0.1$ , \*\*  $p < 0.05$ , \*\*\*  $p < 0.01$ . The following US volatility measures are used in the different specifications: daily returns squared (Vol1), volatility within 2-weeks rolling window (Vol2), GARCH estimated volatility (Vol3), EGARCH estimated volatility (Vol4), realised volatility with intraday average computed every 10 minutes (Vol5), realised volatility with intraday average computed every 5 minutes (Vol6) and option implied volatility index (Vol7).

Table C.46: US Volatilities - Non-Financial Cities

| Dependent variable: Porn Access Index     |                     |                      |                   |                   |                       |                       |                      |
|-------------------------------------------|---------------------|----------------------|-------------------|-------------------|-----------------------|-----------------------|----------------------|
| Independent variable: Volatility Measures | Volatility Measures |                      |                   |                   |                       |                       |                      |
|                                           | Vol1                | Vol2                 | Vol3              | Vol4              | Vol5                  | Vol6                  | Vol7                 |
| China                                     | -0.809<br>(1.027)   | 3.325<br>(7.652)     | -1.265<br>(16.52) | 4.374<br>(20.07)  | 3316.0***<br>(1053.2) | 3417.4***<br>(1097.2) | 2.559***<br>(0.749)  |
| $R^2$                                     | 0.002               | 0.001                | 0.000             | 0.000             | 0.040                 | 0.043                 | 0.031                |
| Observations                              | 260                 | 260                  | 260               | 260               | 251                   | 251                   | 251                  |
| France                                    | -0.156<br>(0.218)   | -2.071<br>(1.291)    | -2.950<br>(3.243) | -4.642<br>(3.963) | 470.8***<br>(173.3)   | 443.2***<br>(168.1)   | 0.694***<br>(0.166)  |
| $R^2$                                     | 0.002               | 0.007                | 0.003             | 0.005             | 0.020                 | 0.018                 | 0.056                |
| Observations                              | 260                 | 260                  | 260               | 260               | 251                   | 251                   | 251                  |
| Germany                                   | -0.0553<br>(0.186)  | 0.949<br>(1.014)     | -1.205<br>(2.093) | -1.696<br>(2.619) | -356.5***<br>(104.2)  | -364.7***<br>(98.45)  | -0.205*<br>(0.113)   |
| $R^2$                                     | 0.000               | 0.003                | 0.001             | 0.001             | 0.027                 | 0.028                 | 0.011                |
| Observations                              | 260                 | 260                  | 260               | 260               | 251                   | 251                   | 251                  |
| Italy                                     | -0.292<br>(0.426)   | -2.040<br>(1.883)    | -6.948<br>(5.050) | -5.661<br>(6.151) | -1450.7***<br>(239.3) | -1502.2***<br>(250.3) | -1.251***<br>(0.217) |
| $R^2$                                     | 0.004               | 0.005                | 0.010             | 0.005             | 0.134                 | 0.144                 | 0.127                |
| Observations                              | 260                 | 260                  | 260               | 260               | 251                   | 251                   | 251                  |
| Japan                                     | 0.183<br>(0.237)    | 3.979***<br>(1.467)  | 6.110<br>(3.944)  | 7.681*<br>(4.206) | 980.7***<br>(250.1)   | 1042.7***<br>(271.2)  | 0.954***<br>(0.159)  |
| $R^2$                                     | 0.003               | 0.033                | 0.014             | 0.016             | 0.112                 | 0.126                 | 0.134                |
| Observations                              | 260                 | 260                  | 260               | 260               | 251                   | 251                   | 251                  |
| Switzerland                               | -0.0769<br>(0.287)  | 0.579<br>(1.688)     | -2.824<br>(3.697) | -0.545<br>(4.352) | -677.9***<br>(189.8)  | -722.8***<br>(189.7)  | -0.326*<br>(0.193)   |
| $R^2$                                     | 0.000               | 0.001                | 0.002             | 0.000             | 0.043                 | 0.049                 | 0.013                |
| Observations                              | 260                 | 260                  | 260               | 260               | 251                   | 251                   | 251                  |
| United Kingdom                            | -0.0726<br>(0.174)  | 0.0162<br>(0.909)    | -0.657<br>(2.186) | -0.411<br>(2.620) | -363.4***<br>(89.81)  | -395.7***<br>(83.83)  | -0.131<br>(0.107)    |
| $R^2$                                     | 0.001               | 0.000                | 0.000             | 0.000             | 0.039                 | 0.047                 | 0.006                |
| Observations                              | 260                 | 260                  | 260               | 260               | 251                   | 251                   | 251                  |
| United States                             | -0.232<br>(0.276)   | -3.687***<br>(1.393) | -5.987<br>(3.761) | -5.387<br>(4.485) | -1127.4***<br>(192.9) | -1179.4***<br>(207.9) | -1.063***<br>(0.154) |
| $R^2$                                     | 0.004               | 0.026                | 0.012             | 0.007             | 0.136                 | 0.149                 | 0.154                |
| Observations                              | 260                 | 260                  | 260               | 260               | 251                   | 251                   | 251                  |

Robust standard errors in parentheses. Statistical significance levels: \*  $p < 0.1$ , \*\*  $p < 0.05$ , \*\*\*  $p < 0.01$ . The following US volatility measures are used in the different specifications: daily returns squared (Vol1), volatility within 2-weeks rolling window (Vol2), GARCH estimated volatility (Vol3), EGARCH estimated volatility (Vol4), realised volatility with intraday average computed every 10 minutes (Vol5), realised volatility with intraday average computed every 5 minutes (Vol6) and option implied volatility index (Vol7).

Table C.47: US Global Measures - Financial Cities

| Dependent variable: Porn Access Index |                                           |                        |                      |
|---------------------------------------|-------------------------------------------|------------------------|----------------------|
|                                       | Independent variable: Volatility Measures |                        |                      |
|                                       | EPU                                       | VIX OIL                | VIX GOLD             |
| China                                 | -0.00191<br>(0.0124)                      | -0.109<br>(0.0803)     | 0.801***<br>(0.304)  |
| $R^2$                                 | 0.000                                     | 0.005                  | 0.020                |
| Observations                          | 366                                       | 251                    | 251                  |
| France                                | 0.0120<br>(0.0140)                        | -0.789***<br>(0.0389)  | -2.710***<br>(0.208) |
| $R^2$                                 | 0.003                                     | 0.405                  | 0.345                |
| Observations                          | 366                                       | 251                    | 251                  |
| Germany                               | 0.204***<br>(0.0638)                      | -2.439***<br>(0.198)   | -8.010***<br>(0.738) |
| $R^2$                                 | 0.081                                     | 0.328                  | 0.255                |
| Observations                          | 366                                       | 251                    | 251                  |
| Italy                                 | 0.0120<br>(0.00915)                       | -0.262***<br>(0.0391)  | 0.217<br>(0.246)     |
| $R^2$                                 | 0.005                                     | 0.068                  | 0.003                |
| Observations                          | 366                                       | 251                    | 251                  |
| Japan                                 | 0.0318**<br>(0.0129)                      | 0.0140<br>(0.0541)     | -0.182<br>(0.248)    |
| $R^2$                                 | 0.029                                     | 0.000                  | 0.002                |
| Observations                          | 366                                       | 251                    | 251                  |
| Singapore                             | 0.0118**<br>(0.00556)                     | 0.125***<br>(0.0238)   | 0.552***<br>(0.0942) |
| $R^2$                                 | 0.009                                     | 0.064                  | 0.090                |
| Observations                          | 366                                       | 251                    | 251                  |
| Switzerland                           | 0.0122*<br>(0.00651)                      | -0.336***<br>(0.0255)  | -1.176***<br>(0.131) |
| $R^2$                                 | 0.009                                     | 0.219                  | 0.193                |
| Observations                          | 366                                       | 251                    | 251                  |
| United Kingdom                        | 0.00670<br>(0.00610)                      | -0.0627***<br>(0.0236) | -0.157<br>(0.104)    |
| $R^2$                                 | 0.006                                     | 0.016                  | 0.007                |
| Observations                          | 366                                       | 251                    | 251                  |
| United States                         | 0.00896<br>(0.0102)                       | -0.688***<br>(0.0374)  | -1.937***<br>(0.209) |
| $R^2$                                 | 0.002                                     | 0.344                  | 0.197                |
| Observations                          | 366                                       | 251                    | 251                  |

Robust standard errors in parentheses. Statistical significance levels: \*  $p < 0.1$ , \*\*  $p < 0.05$ , \*\*\*  $p < 0.01$ . The following US global measures are used in the different specifications: Economic Policy Uncertainty Index (EPU), US oil option implied volatility index (VIX OIL) and US gold option implied volatility index (VIX GOLD).

Table C.48: US Global Measures - Non-Financial Cities

| Dependent variable: Porn Access Index |                                           |                       |                      |
|---------------------------------------|-------------------------------------------|-----------------------|----------------------|
|                                       | Independent variable: Volatility Measures |                       |                      |
|                                       | EPU                                       | VIX OIL               | VIX GOLD             |
| China                                 | -0.122***<br>(0.0333)                     | 2.000***<br>(0.218)   | 7.585***<br>(0.966)  |
| $R^2$                                 | 0.020                                     | 0.151                 | 0.157                |
| Observations                          | 366                                       | 251                   | 251                  |
| France                                | -0.0280**<br>(0.0110)                     | 0.208***<br>(0.0593)  | 1.289***<br>(0.217)  |
| $R^2$                                 | 0.025                                     | 0.041                 | 0.113                |
| Observations                          | 366                                       | 251                   | 251                  |
| Germany                               | 0.0196**<br>(0.00893)                     | -0.198***<br>(0.0317) | -0.890***<br>(0.131) |
| $R^2$                                 | 0.026                                     | 0.085                 | 0.124                |
| Observations                          | 366                                       | 251                   | 251                  |
| Italy                                 | 0.0296**<br>(0.0120)                      | -0.739***<br>(0.0411) | -2.013***<br>(0.245) |
| $R^2$                                 | 0.020                                     | 0.358                 | 0.192                |
| Observations                          | 366                                       | 251                   | 251                  |
| Japan                                 | -0.0142*<br>(0.00815)                     | 0.446***<br>(0.0438)  | 0.552**<br>(0.222)   |
| $R^2$                                 | 0.007                                     | 0.239                 | 0.026                |
| Observations                          | 366                                       | 251                   | 251                  |
| Switzerland                           | 0.0505***<br>(0.0123)                     | -0.285***<br>(0.0517) | -0.144<br>(0.244)    |
| $R^2$                                 | 0.073                                     | 0.078                 | 0.001                |
| Observations                          | 366                                       | 251                   | 251                  |
| United Kingdom                        | 0.0202***<br>(0.00747)                    | -0.157***<br>(0.0257) | -0.239**<br>(0.118)  |
| $R^2$                                 | 0.039                                     | 0.076                 | 0.013                |
| Observations                          | 366                                       | 251                   | 251                  |
| United States                         | 0.00633<br>(0.00721)                      | -0.577***<br>(0.0346) | -1.867***<br>(0.178) |
| $R^2$                                 | 0.001                                     | 0.368                 | 0.277                |
| Observations                          | 366                                       | 251                   | 251                  |

Robust standard errors in parentheses. Statistical significance levels: \*  $p < 0.1$ , \*\*  $p < 0.05$ , \*\*\*  $p < 0.01$ .

The following US global measures are used in the different specifications: Economic Policy Uncertainty Index (EPU), US oil option implied volatility index (VIX OIL) and US gold option implied volatility index (VIX GOLD).

## C.11 Time Use Findings

Table C.49: Pooled regressions on working time

| Dependent variable: Average daily working time (in minutes) in our US cities |                   |                     |                   |                   |                     |                     |                   |                    |                   |                    |
|------------------------------------------------------------------------------|-------------------|---------------------|-------------------|-------------------|---------------------|---------------------|-------------------|--------------------|-------------------|--------------------|
|                                                                              | (1)               | (2)                 | (3)               | (4)               | (5)                 | (6)                 | (7)               | (8)                | (9)               | (10)               |
| Volatility                                                                   | 2.938<br>(3.825)  | 7.266<br>(22.68)    | -78.40<br>(62.52) | -94.87<br>(65.82) | -816.2<br>(2743.8)  | -790.1<br>(2937.8)  | -0.641<br>(3.543) | -0.348*<br>(0.170) | 0.739<br>(0.902)  | 0.910<br>(2.943)   |
| Volatility*Financial City                                                    | -10.12<br>(6.074) | -84.51**<br>(29.64) | -42.23<br>(131.0) | -6.679<br>(162.8) | -2136.8<br>(3024.7) | -3010.8<br>(2945.2) | 0.139<br>(4.006)  | -0.282<br>(0.183)  | -0.751<br>(0.935) | -6.431*<br>(3.513) |
| Financial City                                                               | 14.50<br>(9.383)  | 92.24**<br>(37.56)  | 49.71<br>(165.0)  | 6.528<br>(203.5)  | 12.97<br>(19.83)    | 18.45<br>(21.51)    | -3.234<br>(68.86) | 30.60*<br>(14.55)  | 32.95<br>(43.49)  | 113.0<br>(66.03)   |
| $R^2$                                                                        | 0.002             | 0.005               | 0.004             | 0.003             | 0.001               | 0.001               | 0.000             | 0.009              | 0.001             | 0.001              |
| Observations                                                                 | 1039              | 989                 | 1039              | 1039              | 1015                | 1015                | 1015              | 1706               | 961               | 956                |

Robust standard errors in parentheses, clustered at the city-level. Statistical significance levels: \*  $p < 0.1$ , \*\*  $p < 0.05$ , \*\*\*  $p < 0.01$ .

The following volatility measures are used in the different specifications: daily returns squared (Vol1), volatility within 2-weeks rolling window (Vol2), GARCH estimated volatility (Vol3), EGARCH estimated volatility (Vol4), realised volatility with intraday average computed every 10 minutes (Vol5), realised volatility with intraday average computed every 5 minutes (Vol6), option implied volatility index (Vol7), Economic Policy Uncertainty Index (Vol8), US oil option implied volatility index (Vol9) and US gold option implied volatility index (Vol10).

Table C.50: Pooled regressions on leisure time

| Dependent variable: Average daily leisure time (in minutes) in our US cities |                    |                  |                   |                   |                     |                     |                    |                   |                   |                   |
|------------------------------------------------------------------------------|--------------------|------------------|-------------------|-------------------|---------------------|---------------------|--------------------|-------------------|-------------------|-------------------|
|                                                                              | (1)                | (2)              | (3)               | (4)               | (5)                 | (6)                 | (7)                | (8)               | (9)               | (10)              |
| Volatility                                                                   | -1.858<br>(2.700)  | 12.12<br>(10.93) | 3.377<br>(29.78)  | -22.98<br>(33.95) | 1659.7<br>(1739.0)  | 1573.1<br>(1875.9)  | 2.254<br>(1.989)   | 0.204<br>(0.136)  | 0.117<br>(0.833)  | 3.310<br>(2.064)  |
| Volatility*Financial City                                                    | 1.289<br>(3.603)   | 17.23<br>(10.93) | 25.64<br>(50.68)  | 28.22<br>(61.78)  | -2136.6<br>(2687.0) | -1755.3<br>(2406.2) | -4.607*<br>(2.138) | 0.0806<br>(0.152) | -1.417<br>(1.289) | -5.448<br>(3.971) |
| Financial City                                                               | 19.72**<br>(7.630) | 1.397<br>(13.59) | -9.377<br>(63.01) | -12.58<br>(76.89) | 36.73*<br>(18.14)   | 34.24*<br>(16.91)   | 96.76**<br>(33.96) | 5.967<br>(14.56)  | 85.83<br>(54.29)  | 122.6*<br>(67.99) |
| $R^2$                                                                        | 0.003              | 0.004            | 0.003             | 0.003             | 0.004               | 0.004               | 0.006              | 0.004             | 0.005             | 0.006             |
| Observations                                                                 | 1039               | 989              | 1039              | 1039              | 1015                | 1015                | 1015               | 1706              | 961               | 956               |

Robust standard errors in parentheses, clustered at the city-level. Statistical significance levels: \*  $p < 0.1$ , \*\*  $p < 0.05$ , \*\*\*  $p < 0.01$ .

The following volatility measures are used in the different specifications: daily returns squared (Vol1), volatility within 2-weeks rolling window (Vol2), GARCH estimated volatility (Vol3), EGARCH estimated volatility (Vol4), realised volatility with intraday average computed every 10 minutes (Vol5), realised volatility with intraday average computed every 5 minutes (Vol6), option implied volatility index (Vol7), Economic Policy Uncertainty Index (Vol8), US oil option implied volatility index (Vol9) and US gold option implied volatility index (Vol10).
